# Supplementary material for: Characterization of Resistome in Lactobacillus Genomic Sequences From the Human Gut
Source: Research Square preprint supplement (doi:10.21203/rs.3.rs-1422378/v1), 2022-03-10
Supplement: Supplementary file 1 [file 63e22c5397414b57ea3c2f76.xlsx]

## Sheet: Sheet1
#	Assembly name	Organism name	strain/Isolate	BioProject	BioSample	collection date	host	isolation source	geographic location	RefSeq assembly accession	Date	Assembly level	Total sequence length	Total ungapped length	RGI Criteria	ARO Term	SNP	Detection Criteria	AMR Gene Family	Drug Class	Resistance Mechanism	% Identity of Matching Region	% Length of Reference Sequence
1	ASM729211v1	Lacticaseibacillus paracasei (firmicutes)	CBA3611	PRJNA545404	SAMN11890849	2018-11	Homo sapiens	human-fecal	South Korea: Gwangju	GCF_007292115.1	2019-07-23	Complete Genome	3102530	3102530	Strict	poxtA		protein homolog model	ABC-F ATP-binding cassette ribosomal protection protein	macrolide antibiotic, lincosamide antibiotic, streptogramin antibiotic, tetracycline antibiotic, oxazolidinone antibiotic, phenicol antibiotic, pleuromutilin antibiotic	antibiotic target protection	100	61.07
															Strict	APH(2'')-Ie		protein homolog model	APH(2'')	aminoglycoside antibiotic	antibiotic inactivation	100	24.92
2	ASM159760v1	Lactiplantibacillus plantarum (firmicutes)	E2C5	PRJNA313343	SAMN04519660	2015-11-23	Homo sapiens	stool material	India: Pune	GCF_001597605.1	2016-03-25	Contig	3615168	3615168	Strict	Trimethoprim-resistant dihydrofolate reductase DfrA42		protein homolog model	trimethoprim resistant dihydrofolate reductase dfr	diaminopyrimidine antibiotic	antibiotic target replacement	28.86	92.09
3	ASM188867v1	Lactiplantibacillus plantarum (firmicutes)	CIF17AN8	PRJNA283610	SAMN03654503	2007	Homo sapiens	feces	Thailand: Songkhla	GCF_001888675.1	2016-12-03	Contig	3105446	3105446	Strict	Trimethoprim-resistant dihydrofolate reductase DfrA42		protein homolog model	trimethoprim resistant dihydrofolate reductase dfr	diaminopyrimidine antibiotic	antibiotic target replacement	29.53	92.09
4	ASM188864v1	Lactiplantibacillus plantarum (firmicutes)	CIF17AN2	PRJNA283610	SAMN03654502	2007	Homo sapiens	feces	Thailand: Songkhla	GCF_001888645.1	2016-12-03	Contig	3127674	3127674	Strict	Trimethoprim-resistant dihydrofolate reductase DfrA42		protein homolog model	trimethoprim resistant dihydrofolate reductase dfr	diaminopyrimidine antibiotic	antibiotic target replacement	29.53	92.09
5	ASM188858v1	Lactiplantibacillus plantarum (firmicutes)	CIF17A4	PRJNA283610	SAMN03654500	2007	Homo sapiens	feces	Thailand: Songkhla	GCF_001888585.1	2016-12-03	Contig	3105750	3105750	Strict	Trimethoprim-resistant dihydrofolate reductase DfrA42		protein homolog model	trimethoprim resistant dihydrofolate reductase dfr	diaminopyrimidine antibiotic	antibiotic target replacement	29.53	92.09
6	ASM188857v1	Lactiplantibacillus plantarum (firmicutes)	CIF17A2	PRJNA283610	SAMN03654499	2007	Homo sapiens	feces	Thailand: Songkhla	GCF_001888575.1	2016-12-03	Contig	3104243	3104243	Strict	Trimethoprim-resistant dihydrofolate reductase DfrA42		protein homolog model	trimethoprim resistant dihydrofolate reductase dfr	diaminopyrimidine antibiotic	antibiotic target replacement	29.53	92.09
7	ASM188859v1	Lactiplantibacillus plantarum (firmicutes)	CIF17A5	PRJNA283610	SAMN03654501	2007	Homo sapiens	feces	Thailand: Songkhla	GCF_001888595.1	2016-12-03	Contig	3104906	3104906	Strict	Trimethoprim-resistant dihydrofolate reductase DfrA42		protein homolog model	trimethoprim resistant dihydrofolate reductase dfr	diaminopyrimidine antibiotic	antibiotic target replacement	29.53	92.09
8	ASM188856v1	Lactiplantibacillus plantarum (firmicutes)	I08	PRJNA283610	SAMN03654504	2009	Homo sapiens	feces	Thailand: Songkhla	GCF_001888565.1	2016-12-03	Contig	3312306	3312306	Strict	Trimethoprim-resistant dihydrofolate reductase DfrA42		protein homolog model	trimethoprim resistant dihydrofolate reductase dfr	diaminopyrimidine antibiotic	antibiotic target replacement	28.86	92.09
9	ASM188824v1	Lactiplantibacillus plantarum (firmicutes)	I61	PRJNA283610	SAMN03654505	2009	Homo sapiens	feces	Thailand: Songkhla	GCF_001888245.1	2016-12-03	Contig	3313161	3313161	Strict	Trimethoprim-resistant dihydrofolate reductase DfrA42		protein homolog model	trimethoprim resistant dihydrofolate reductase dfr	diaminopyrimidine antibiotic	antibiotic target replacement	28.86	92.09
10	ASM1152648v1	Lactobacillus sp. (firmicutes)	DA10166-9	PRJNA597463	SAMN13675794	2011-10-20	Homo sapiens	feces from healthy female	USA: University of Michigan Hospital, Ann Arbor, MI	n/a	2020-03-20	Scaffold	1185253	1183389
11	ASM967950v1	Lacticaseibacillus paracasei (firmicutes)	BIOML-A1	PRJNA544527	SAMN11946114	09_Dec_2015	Homo sapiens	fecal material	USA:Boston	GCF_009679505.1	2019-11-20	Contig	2668162	2668162	Strict	poxtA		protein homolog model	ABC-F ATP-binding cassette ribosomal protection protein	macrolide antibiotic, lincosamide antibiotic, streptogramin antibiotic, tetracycline antibiotic, oxazolidinone antibiotic, phenicol antibiotic, pleuromutilin antibiotic	antibiotic target protection	100	61.07
12	ASM967949v1	Lacticaseibacillus paracasei (firmicutes)	BIOML-A2	PRJNA544527	SAMN11946115	09-Dec-2015	Homo sapiens	fecal material	USA:Boston	GCF_009679495.1	2019-11-20	Scaffold	2724106	2720202	Perfect	QnrB19		protein homolog model	quinolone resistance protein (qnr)	fluoroquinolone antibiotic	antibiotic target protection	100	105.61
															Strict	poxtA		protein homolog model	ABC-F ATP-binding cassette ribosomal protection protein	macrolide antibiotic, lincosamide antibiotic, streptogramin antibiotic, tetracycline antibiotic, oxazolidinone antibiotic, phenicol antibiotic, pleuromutilin antibiotic	antibiotic target protection	100	61.07
13	ASM967945v1	Lacticaseibacillus paracasei (firmicutes)	BIOML-A4	PRJNA544527	SAMN11946117	09-Dec-2015	Homo sapiens	fecal material	USA:Boston	GCF_009679455.1	2019-11-20	Scaffold	2650013	2645530	Strict	poxtA		protein homolog model	ABC-F ATP-binding cassette ribosomal protection protein	macrolide antibiotic, lincosamide antibiotic, streptogramin antibiotic, tetracycline antibiotic, oxazolidinone antibiotic, phenicol antibiotic, pleuromutilin antibiotic	antibiotic target protection	100	61.07
14	ASM967943v1	Lacticaseibacillus paracasei (firmicutes)	BIOML-A3	PRJNA544527	SAMN11946116	09_Dec_2015	Homo sapiens	fecal material	USA:Boston	GCF_009679435.1	2019-11-20	Scaffold	2704019	2700246	Strict	poxtA		protein homolog model	ABC-F ATP-binding cassette ribosomal protection protein	macrolide antibiotic, lincosamide antibiotic, streptogramin antibiotic, tetracycline antibiotic, oxazolidinone antibiotic, phenicol antibiotic, pleuromutilin antibiotic	antibiotic target protection	100	61.07
15	ASM967940v1	Lactobacillus rhamnosus (firmicutes)	BIOML-A2	PRJNA544527	SAMN11946119	09-Dec-2015	Homo sapiens	fecal material	USA:Boston	GCF_009679405.1	2019-11-20	Contig	2943658	2943658	Strict	BJP-1		protein homolog model	BJP beta-lactamase	carbapenem	antibiotic inactivation	100	30.27
															Strict	lmrB		protein homolog model	ATP-binding cassette (ABC) antibiotic efflux pump	lincosamide antibiotic	antibiotic efflux	100	12.79
16	ASM967939v1	Lactobacillus rhamnosus (firmicutes)	BIOML-A3	PRJNA544527	SAMN11946120	04-Jul-2014	Homo sapiens	fecal material	USA:Boston	GCF_009679395.1	2019-11-20	Scaffold	3148263	3148170	Strict	BJP-1		protein homolog model	BJP beta-lactamase	carbapenem	antibiotic inactivation	100	31.29
															Strict	lmrB		protein homolog model	ATP-binding cassette (ABC) antibiotic efflux pump	lincosamide antibiotic	antibiotic efflux	100	12.79
17	ASM967935v1	Lactobacillus rhamnosus (firmicutes)	BIOML-A6	PRJNA544527	SAMN11946123	09-Dec-2015	Homo sapiens	fecal material	USA:Boston	GCF_009679355.1	2019-11-20	Contig	3045693	3045693	Strict	lmrB		protein homolog model	ATP-binding cassette (ABC) antibiotic efflux pump	lincosamide antibiotic	antibiotic efflux	100	12.79
															Strict	BJP-1		protein homolog model	BJP beta-lactamase	carbapenem	antibiotic inactivation	100	30.27
18	ASM967933v1	Lactobacillus rhamnosus (firmicutes)	BIOML-A4	PRJNA544527	SAMN11946121	04-Jul-2014	Homo sapiens	fecal material	USA:Boston	GCF_009679335.1	2019-11-20	Scaffold	3436367	3436286	Strict	BJP-1		protein homolog model	BJP beta-lactamase	carbapenem	antibiotic inactivation	100	31.29
															Strict	lmrB		protein homolog model	ATP-binding cassette (ABC) antibiotic efflux pump	lincosamide antibiotic	antibiotic efflux	100	12.79
19	ASM967934v1	Lactobacillus rhamnosus (firmicutes)	BIOML-A5	PRJNA544527	SAMN11946122	31-Mar-2015	Homo sapiens	fecal material	USA:Boston	GCF_009679345.1	2019-11-20	Contig	2864447	2864447	Strict	lmrB		protein homolog model	ATP-binding cassette (ABC) antibiotic efflux pump	lincosamide antibiotic	antibiotic efflux	100	12.79
20	ASM967930v1	Lactobacillus rhamnosus (firmicutes)	BIOML-A7	PRJNA544527	SAMN11946124	09-Dec-2015	Homo sapiens	fecal material	USA:Boston	GCF_009679305.1	2019-11-20	Scaffold	3401650	3401597	Strict	lmrB		protein homolog model	ATP-binding cassette (ABC) antibiotic efflux pump	lincosamide antibiotic	antibiotic efflux	100	12.79
															Strict	BJP-1		protein homolog model	BJP beta-lactamase	carbapenem	antibiotic inactivation	100	30.27
21	ASM967929v1	Lactobacillus rhamnosus (firmicutes)	BIOML-A8	PRJNA544527	SAMN11946125	09-Dec-2015	Homo sapiens	fecal material	USA:Boston	GCF_009679295.1	2019-11-20	Contig	3064548	3064548	Strict	lmrB		protein homolog model	ATP-binding cassette (ABC) antibiotic efflux pump	lincosamide antibiotic	antibiotic efflux	100	12.79
															Strict	BJP-1		protein homolog model	BJP beta-lactamase	carbapenem	antibiotic inactivation	100	30.27
22	ASM967926v1	Lactobacillus rhamnosus (firmicutes)	BIOML-A9	PRJNA544527	SAMN11946126	09-Dec-2015	Homo sapiens	fecal material	USA:Boston	GCF_009679265.1	2019-11-20	Contig	2943827	2943827	Strict	lmrB		protein homolog model	ATP-binding cassette (ABC) antibiotic efflux pump	lincosamide antibiotic	antibiotic efflux	100	12.79
															Strict	BJP-1		protein homolog model	BJP beta-lactamase	carbapenem	antibiotic inactivation	100	30.27
23	ASM967925v1	Lactobacillus rhamnosus (firmicutes)	BIOML-A10	PRJNA544527	SAMN11946127	09-Dec-2015	Homo sapiens	fecal material	USA:Boston	GCF_009679255.1	2019-11-20	Contig	2942094	2942094	Strict	BJP-1		protein homolog model	BJP beta-lactamase	carbapenem	antibiotic inactivation	100	30.27
															Strict	lmrB		protein homolog model	ATP-binding cassette (ABC) antibiotic efflux pump	lincosamide antibiotic	antibiotic efflux	100	12.79
24	ASM967944v1	Lactobacillus rhamnosus (firmicutes)	BIOML-A1	PRJNA544527	SAMN11946118	09-Dec-2015	Homo sapiens	fecal material	USA:Boston	GCF_009679445.1	2019-11-20	Scaffold	2665859	2665149	Strict	BJP-1		protein homolog model	BJP beta-lactamase	carbapenem	antibiotic inactivation	100	30.27
															Strict	poxtA		protein homolog model	ABC-F ATP-binding cassette ribosomal protection protein	macrolide antibiotic, lincosamide antibiotic, streptogramin antibiotic, tetracycline antibiotic, oxazolidinone antibiotic, phenicol antibiotic, pleuromutilin antibiotic	antibiotic target protection	100	48.15
															Strict	lmrB		protein homolog model	ATP-binding cassette (ABC) antibiotic efflux pump	lincosamide antibiotic	antibiotic efflux	100	12.79
25	ASM967809v1	Lactobacillus ruminis (firmicutes)	BIOML-A14	PRJNA544527	SAMN11946141	09-Dec-2015	Homo sapiens	fecal material	USA:Boston	GCF_009678095.1	2019-11-20	Scaffold	2133409	2133398	Strict	Trimethoprim-resistant dihydrofolate reductase DfrA42		protein homolog model	trimethoprim resistant dihydrofolate reductase dfr	diaminopyrimidine antibiotic	antibiotic target replacement	25.44	119.77
															Strict	Trimethoprim-resistant dihydrofolate reductase DfrA42		protein homolog model	trimethoprim resistant dihydrofolate reductase dfr	diaminopyrimidine antibiotic	antibiotic target replacement	25.81	94.35
26	ASM967805v1	Lactobacillus ruminis (firmicutes)	BIOML-A17	PRJNA544527	SAMN11946144	09-Dec-2015	Homo sapiens	fecal material	USA:Boston	GCF_009678055.1	2019-11-20	Scaffold	2136010	2135947	Strict	Trimethoprim-resistant dihydrofolate reductase DfrA42		protein homolog model	trimethoprim resistant dihydrofolate reductase dfr	diaminopyrimidine antibiotic	antibiotic target replacement	25.44	119.77
															Strict	Trimethoprim-resistant dihydrofolate reductase DfrA42		protein homolog model	trimethoprim resistant dihydrofolate reductase dfr	diaminopyrimidine antibiotic	antibiotic target replacement	25.81	94.35
27	ASM967802v1	Lactobacillus ruminis (firmicutes)	BIOML-A16	PRJNA544527	SAMN11946143	09-Dec-2015	Homo sapiens	fecal material	USA:Boston	GCF_009678025.1	2019-11-20	Contig	2135334	2135334	Strict	Trimethoprim-resistant dihydrofolate reductase DfrA42		protein homolog model	trimethoprim resistant dihydrofolate reductase dfr	diaminopyrimidine antibiotic	antibiotic target replacement	25.44	119.77
															Strict	Trimethoprim-resistant dihydrofolate reductase DfrA42		protein homolog model	trimethoprim resistant dihydrofolate reductase dfr	diaminopyrimidine antibiotic	antibiotic target replacement	25.81	94.35
28	ASM967803v1	Lactobacillus ruminis (firmicutes)	BIOML-A18	PRJNA544527	SAMN11946145	09-Dec-2015	Homo sapiens	fecal material	USA:Boston	GCF_009678035.1	2019-11-20	Scaffold	2156044	2156023	Strict	Trimethoprim-resistant dihydrofolate reductase DfrA42		protein homolog model	trimethoprim resistant dihydrofolate reductase dfr	diaminopyrimidine antibiotic	antibiotic target replacement	25.44	119.77
															Strict	Trimethoprim-resistant dihydrofolate reductase DfrA42		protein homolog model	trimethoprim resistant dihydrofolate reductase dfr	diaminopyrimidine antibiotic	antibiotic target replacement	25.81	94.35
29	ASM967801v1	Lactobacillus ruminis (firmicutes)	BIOML-A19	PRJNA544527	SAMN11946146	09-Dec-2015	Homo sapiens	fecal material	USA:Boston	GCF_009678015.1	2019-11-20	Scaffold	2157177	2157118	Strict	Trimethoprim-resistant dihydrofolate reductase DfrA42		protein homolog model	trimethoprim resistant dihydrofolate reductase dfr	diaminopyrimidine antibiotic	antibiotic target replacement	25.44	119.77
															Strict	Trimethoprim-resistant dihydrofolate reductase DfrA42		protein homolog model	trimethoprim resistant dihydrofolate reductase dfr	diaminopyrimidine antibiotic	antibiotic target replacement	25.81	94.35
30	ASM967813v1	Lactobacillus ruminis (firmicutes)	BIOML-A13	PRJNA544527	SAMN11946140	09-Dec-2015	Homo sapiens	fecal material	USA:Boston	GCF_009678135.1	2019-11-20	Scaffold	2146568	2146524	Strict	Trimethoprim-resistant dihydrofolate reductase DfrA42		protein homolog model	trimethoprim resistant dihydrofolate reductase dfr	diaminopyrimidine antibiotic	antibiotic target replacement	25.44	119.77
															Strict	Trimethoprim-resistant dihydrofolate reductase DfrA42		protein homolog model	trimethoprim resistant dihydrofolate reductase dfr	diaminopyrimidine antibiotic	antibiotic target replacement	25.81	94.35
31	ASM967795v1	Lactobacillus ruminis (firmicutes)	BIOML-A22	PRJNA544527	SAMN11946149	09-Dec-2015	Homo sapiens	fecal material	USA:Boston	GCF_009677955.1	2019-11-20	Contig	2134712	2134712	Strict	Trimethoprim-resistant dihydrofolate reductase DfrA42		protein homolog model	trimethoprim resistant dihydrofolate reductase dfr	diaminopyrimidine antibiotic	antibiotic target replacement	25.44	119.77
															Strict	Trimethoprim-resistant dihydrofolate reductase DfrA42		protein homolog model	trimethoprim resistant dihydrofolate reductase dfr	diaminopyrimidine antibiotic	antibiotic target replacement	25.81	94.35
32	ASM967923v1	Lactobacillus ruminis (firmicutes)	BIOML-A1	PRJNA544527	SAMN11946128	15-Jan-2016	Homo sapiens	fecal material	USA:Boston	GCF_009679235.1	2019-11-20	Contig	2137966	2137966	Strict	Trimethoprim-resistant dihydrofolate reductase DfrA42		protein homolog model	trimethoprim resistant dihydrofolate reductase dfr	diaminopyrimidine antibiotic	antibiotic target replacement	25.44	119.77
															Strict	Trimethoprim-resistant dihydrofolate reductase DfrA42		protein homolog model	trimethoprim resistant dihydrofolate reductase dfr	diaminopyrimidine antibiotic	antibiotic target replacement	25.81	94.35
33	ASM967919v1	Lactobacillus ruminis (firmicutes)	BIOML-A3	PRJNA544527	SAMN11946130	15-Jan-2016	Homo sapiens	fecal material	USA:Boston	GCF_009679195.1	2019-11-20	Contig	2151294	2151294	Strict	Trimethoprim-resistant dihydrofolate reductase DfrA42		protein homolog model	trimethoprim resistant dihydrofolate reductase dfr	diaminopyrimidine antibiotic	antibiotic target replacement	25.44	119.77
															Strict	Trimethoprim-resistant dihydrofolate reductase DfrA42		protein homolog model	trimethoprim resistant dihydrofolate reductase dfr	diaminopyrimidine antibiotic	antibiotic target replacement	25.81	94.35
34	ASM967920v1	Lactobacillus ruminis (firmicutes)	BIOML-A4	PRJNA544527	SAMN11946131	15-Jan-2016	Homo sapiens	fecal material	USA:Boston	GCF_009679205.1	2019-11-20	Contig	2303365	2303365	Strict	Trimethoprim-resistant dihydrofolate reductase DfrA42		protein homolog model	trimethoprim resistant dihydrofolate reductase dfr	diaminopyrimidine antibiotic	antibiotic target replacement	25.44	119.77
															Strict	Trimethoprim-resistant dihydrofolate reductase DfrA42		protein homolog model	trimethoprim resistant dihydrofolate reductase dfr	diaminopyrimidine antibiotic	antibiotic target replacement	25.81	94.35
35	ASM967916v1	Lactobacillus ruminis (firmicutes)	BIOML-A5	PRJNA544527	SAMN11946132	15-Jan-2016	Homo sapiens	fecal material	USA:Boston	GCF_009679165.1	2019-11-20	Contig	2278508	2278508	Strict	Trimethoprim-resistant dihydrofolate reductase DfrA42		protein homolog model	trimethoprim resistant dihydrofolate reductase dfr	diaminopyrimidine antibiotic	antibiotic target replacement	25.81	94.35
															Strict	Trimethoprim-resistant dihydrofolate reductase DfrA42		protein homolog model	trimethoprim resistant dihydrofolate reductase dfr	diaminopyrimidine antibiotic	antibiotic target replacement	25.44	119.77
36	ASM967915v1	Lactobacillus ruminis (firmicutes)	BIOML-A6	PRJNA544527	SAMN11946133	15-Jan-2016	Homo sapiens	fecal material	USA:Boston	GCF_009679155.1	2019-11-20	Contig	2131094	2131094	Strict	Trimethoprim-resistant dihydrofolate reductase DfrA42		protein homolog model	trimethoprim resistant dihydrofolate reductase dfr	diaminopyrimidine antibiotic	antibiotic target replacement	25.44	119.77
															Strict	Trimethoprim-resistant dihydrofolate reductase DfrA42		protein homolog model	trimethoprim resistant dihydrofolate reductase dfr	diaminopyrimidine antibiotic	antibiotic target replacement	25.81	94.35
37	ASM967913v1	Lactobacillus ruminis (firmicutes)	BIOML-A8	PRJNA544527	SAMN11946135	09-Dec-2015	Homo sapiens	fecal material	USA:Boston	GCF_009679135.1	2019-11-20	Scaffold	2143505	2141366	Strict	Trimethoprim-resistant dihydrofolate reductase DfrA42		protein homolog model	trimethoprim resistant dihydrofolate reductase dfr	diaminopyrimidine antibiotic	antibiotic target replacement	25.44	119.77
															Strict	Trimethoprim-resistant dihydrofolate reductase DfrA42		protein homolog model	trimethoprim resistant dihydrofolate reductase dfr	diaminopyrimidine antibiotic	antibiotic target replacement	25.81	94.35
38	ASM967911v1	Lactobacillus ruminis (firmicutes)	BIOML-A7	PRJNA544527	SAMN11946134	09-Dec-2015	Homo sapiens	fecal material	USA:Boston	GCF_009679115.1	2019-11-20	Scaffold	2147610	2146207	Strict	Trimethoprim-resistant dihydrofolate reductase DfrA42		protein homolog model	trimethoprim resistant dihydrofolate reductase dfr	diaminopyrimidine antibiotic	antibiotic target replacement	25.44	119.77
															Strict	Trimethoprim-resistant dihydrofolate reductase DfrA42		protein homolog model	trimethoprim resistant dihydrofolate reductase dfr	diaminopyrimidine antibiotic	antibiotic target replacement	25.81	94.35
39	ASM967909v1	Lactobacillus ruminis (firmicutes)	BIOML-A9	PRJNA544527	SAMN11946136	09-Dec-2015	Homo sapiens	fecal material	USA:Boston	GCF_009679095.1	2019-11-20	Scaffold	2153519	2149866	Strict	Trimethoprim-resistant dihydrofolate reductase DfrA42		protein homolog model	trimethoprim resistant dihydrofolate reductase dfr	diaminopyrimidine antibiotic	antibiotic target replacement	25.44	119.77
															Strict	Trimethoprim-resistant dihydrofolate reductase DfrA42		protein homolog model	trimethoprim resistant dihydrofolate reductase dfr	diaminopyrimidine antibiotic	antibiotic target replacement	25.81	94.35
40	ASM967906v1	Lactobacillus ruminis (firmicutes)	BIOML-A11	PRJNA544527	SAMN11946138	09-Dec-2015	Homo sapiens	fecal material	USA:Boston	GCF_009679065.1	2019-11-20	Contig	2133280	2133280	Strict	Trimethoprim-resistant dihydrofolate reductase DfrA42		protein homolog model	trimethoprim resistant dihydrofolate reductase dfr	diaminopyrimidine antibiotic	antibiotic target replacement	25.44	119.77
															Strict	Trimethoprim-resistant dihydrofolate reductase DfrA42		protein homolog model	trimethoprim resistant dihydrofolate reductase dfr	diaminopyrimidine antibiotic	antibiotic target replacement	25.81	94.35
41	ASM967905v1	Lactobacillus ruminis (firmicutes)	BIOML-A10	PRJNA544527	SAMN11946137	09-Dec-2015	Homo sapiens	fecal material	USA:Boston	GCF_009679055.1	2019-11-20	Scaffold	2131997	2131976	Strict	Trimethoprim-resistant dihydrofolate reductase DfrA42		protein homolog model	trimethoprim resistant dihydrofolate reductase dfr	diaminopyrimidine antibiotic	antibiotic target replacement	25.44	119.77
															Strict	Trimethoprim-resistant dihydrofolate reductase DfrA42		protein homolog model	trimethoprim resistant dihydrofolate reductase dfr	diaminopyrimidine antibiotic	antibiotic target replacement	25.81	94.35
42	ASM967901v1	Lactobacillus ruminis (firmicutes)	BIOML-A12	PRJNA544527	SAMN11946139	09-Dec-2015	Homo sapiens	fecal material	USA:Boston	GCF_009679015.1	2019-11-20	Contig	2328083	2328083	Strict	Trimethoprim-resistant dihydrofolate reductase DfrA42		protein homolog model	trimethoprim resistant dihydrofolate reductase dfr	diaminopyrimidine antibiotic	antibiotic target replacement	25.44	119.77
															Strict	Trimethoprim-resistant dihydrofolate reductase DfrA42		protein homolog model	trimethoprim resistant dihydrofolate reductase dfr	diaminopyrimidine antibiotic	antibiotic target replacement	25.81	94.35
43	ASM967900v1	Lactobacillus ruminis (firmicutes)	BIOML-A21	PRJNA544527	SAMN11946148	09-Dec-2015	Homo sapiens	fecal material	USA:Boston	GCF_009679005.1	2019-11-20	Contig	2135461	2135461	Strict	Trimethoprim-resistant dihydrofolate reductase DfrA42		protein homolog model	trimethoprim resistant dihydrofolate reductase dfr	diaminopyrimidine antibiotic	antibiotic target replacement	25.44	119.77
															Strict	Trimethoprim-resistant dihydrofolate reductase DfrA42		protein homolog model	trimethoprim resistant dihydrofolate reductase dfr	diaminopyrimidine antibiotic	antibiotic target replacement	25.81	94.35
44	ASM967899v1	Lactobacillus ruminis (firmicutes)	BIOML-A15	PRJNA544527	SAMN11946142	09-Dec-2015	Homo sapiens	fecal material	USA:Boston	GCF_009678995.1	2019-11-20	Contig	2152521	2152521	Strict	Trimethoprim-resistant dihydrofolate reductase DfrA42		protein homolog model	trimethoprim resistant dihydrofolate reductase dfr	diaminopyrimidine antibiotic	antibiotic target replacement	25.44	119.77
															Strict	Trimethoprim-resistant dihydrofolate reductase DfrA42		protein homolog model	trimethoprim resistant dihydrofolate reductase dfr	diaminopyrimidine antibiotic	antibiotic target replacement	25.81	94.35
45	ASM967896v1	Lactobacillus ruminis (firmicutes)	BIOML-A24	PRJNA544527	SAMN11946151	09-Dec-2015	Homo sapiens	fecal material	USA:Boston	GCF_009678965.1	2019-11-20	Scaffold	2153632	2153271	Strict	Trimethoprim-resistant dihydrofolate reductase DfrA42		protein homolog model	trimethoprim resistant dihydrofolate reductase dfr	diaminopyrimidine antibiotic	antibiotic target replacement	25.44	119.77
															Strict	Trimethoprim-resistant dihydrofolate reductase DfrA42		protein homolog model	trimethoprim resistant dihydrofolate reductase dfr	diaminopyrimidine antibiotic	antibiotic target replacement	25.81	94.35
46	ASM967895v1	Lactobacillus ruminis (firmicutes)	BIOML-A25	PRJNA544527	SAMN11946152	09-Dec-2015	Homo sapiens	fecal material	USA:Boston	GCF_009678955.1	2019-11-20	Scaffold	2163313	2163204	Strict	Trimethoprim-resistant dihydrofolate reductase DfrA42		protein homolog model	trimethoprim resistant dihydrofolate reductase dfr	diaminopyrimidine antibiotic	antibiotic target replacement	25.81	94.35
															Strict	Trimethoprim-resistant dihydrofolate reductase DfrA42		protein homolog model	trimethoprim resistant dihydrofolate reductase dfr	diaminopyrimidine antibiotic	antibiotic target replacement	25.44	119.77
47	ASM967891v1	Lactobacillus ruminis (firmicutes)	BIOML-A26	PRJNA544527	SAMN11946153	09-Dec-2015	Homo sapiens	fecal material	USA:Boston	GCF_009678915.1	2019-11-20	Scaffold	2144300	2144089	Strict	Trimethoprim-resistant dihydrofolate reductase DfrA42		protein homolog model	trimethoprim resistant dihydrofolate reductase dfr	diaminopyrimidine antibiotic	antibiotic target replacement	25.44	119.77
															Strict	Trimethoprim-resistant dihydrofolate reductase DfrA42		protein homolog model	trimethoprim resistant dihydrofolate reductase dfr	diaminopyrimidine antibiotic	antibiotic target replacement	25.81	94.35
48	ASM967777v1	Lactobacillus ruminis (firmicutes)	BIOML-A20	PRJNA544527	SAMN11946147	09-Dec-2015	Homo sapiens	fecal material	USA:Boston	GCF_009677775.1	2019-11-20	Contig	2134907	2134907	Strict	Trimethoprim-resistant dihydrofolate reductase DfrA42		protein homolog model	trimethoprim resistant dihydrofolate reductase dfr	diaminopyrimidine antibiotic	antibiotic target replacement	25.44	119.77
															Strict	Trimethoprim-resistant dihydrofolate reductase DfrA42		protein homolog model	trimethoprim resistant dihydrofolate reductase dfr	diaminopyrimidine antibiotic	antibiotic target replacement	25.81	94.35
49	ASM967776v1	Lactobacillus ruminis (firmicutes)	BIOML-A27	PRJNA544527	SAMN11946154	09-Dec-2015	Homo sapiens	fecal material	USA:Boston	GCF_009677765.1	2019-11-20	Scaffold	2144749	2144604	Strict	Trimethoprim-resistant dihydrofolate reductase DfrA42		protein homolog model	trimethoprim resistant dihydrofolate reductase dfr	diaminopyrimidine antibiotic	antibiotic target replacement	25.44	119.77
															Strict	Trimethoprim-resistant dihydrofolate reductase DfrA42		protein homolog model	trimethoprim resistant dihydrofolate reductase dfr	diaminopyrimidine antibiotic	antibiotic target replacement	25.81	94.35
50	ASM967775v1	Lactobacillus ruminis (firmicutes)	BIOML-A23	PRJNA544527	SAMN11946150	09_Dec_2015	Homo sapiens	fecal material	USA:Boston	GCF_009677755.1	2019-11-20	Contig	2136429	2136429	Strict	Trimethoprim-resistant dihydrofolate reductase DfrA42		protein homolog model	trimethoprim resistant dihydrofolate reductase dfr	diaminopyrimidine antibiotic	antibiotic target replacement	25.44	119.77
															Strict	Trimethoprim-resistant dihydrofolate reductase DfrA42		protein homolog model	trimethoprim resistant dihydrofolate reductase dfr	diaminopyrimidine antibiotic	antibiotic target replacement	25.81	94.35
51	ASM967773v1	Lactobacillus ruminis (firmicutes)	BIOML-A28	PRJNA544527	SAMN11946155	09-Dec-2015	Homo sapiens	fecal material	USA:Boston	GCF_009677735.1	2019-11-20	Scaffold	2166086	2165907	Strict	Trimethoprim-resistant dihydrofolate reductase DfrA42		protein homolog model	trimethoprim resistant dihydrofolate reductase dfr	diaminopyrimidine antibiotic	antibiotic target replacement	25.44	119.77
															Strict	Trimethoprim-resistant dihydrofolate reductase DfrA42		protein homolog model	trimethoprim resistant dihydrofolate reductase dfr	diaminopyrimidine antibiotic	antibiotic target replacement	25.81	94.35
52	ASM967767v1	Lactobacillus ruminis (firmicutes)	BIOML-A29	PRJNA544527	SAMN11946156	09-Dec-2015	Homo sapiens	fecal material	USA:Boston	GCF_009677675.1	2019-11-20	Scaffold	2147633	2147622	Strict	Trimethoprim-resistant dihydrofolate reductase DfrA42		protein homolog model	trimethoprim resistant dihydrofolate reductase dfr	diaminopyrimidine antibiotic	antibiotic target replacement	25.44	119.77
															Strict	Trimethoprim-resistant dihydrofolate reductase DfrA42		protein homolog model	trimethoprim resistant dihydrofolate reductase dfr	diaminopyrimidine antibiotic	antibiotic target replacement	25.81	94.35
53	ASM200355v1	Lactobacillus gasseri (firmicutes)	AL5	PRJNA369598	SAMN06289783	2015	Homo sapiens	stool	Italy	GCF_002003555.1	2017-02-17	Scaffold	1985720	1979375	Strict	poxtA		protein homolog model	ABC-F ATP-binding cassette ribosomal protection protein	macrolide antibiotic, lincosamide antibiotic, streptogramin antibiotic, tetracycline antibiotic, oxazolidinone antibiotic, phenicol antibiotic, pleuromutilin antibiotic	antibiotic target protection	100	81.73
															Strict	Trimethoprim-resistant dihydrofolate reductase DfrA42		protein homolog model	trimethoprim resistant dihydrofolate reductase dfr	diaminopyrimidine antibiotic	antibiotic target replacement	26.92	95.48
54	ASM200718v1	Lactobacillus gasseri (firmicutes)	AL3	PRJNA363050	SAMN06252408	2014	Homo sapiens	stool	Italy	GCF_002007185.1	2017-02-17	Scaffold	1987978	1985869	Strict	Trimethoprim-resistant dihydrofolate reductase DfrA42		protein homolog model	trimethoprim resistant dihydrofolate reductase dfr	diaminopyrimidine antibiotic	antibiotic target replacement	26.92	95.48
															Strict	poxtA		protein homolog model	ABC-F ATP-binding cassette ribosomal protection protein	macrolide antibiotic, lincosamide antibiotic, streptogramin antibiotic, tetracycline antibiotic, oxazolidinone antibiotic, phenicol antibiotic, pleuromutilin antibiotic	antibiotic target protection	100	81.73
55	ASM1487048v1	Lactobacillus johnsonii (firmicutes)	COPD094	PRJNA562766	SAMN12905041	Apr-2015/Sep-2016	Homo sapiens	feces	Australia: Newcastle	n/a	2020-10-08	Contig	1388167	1388167	Strict	aadS		protein homolog model	ANT(6)	aminoglycoside antibiotic	antibiotic inactivation	99.62	91.99
															Strict	EreD		protein homolog model	macrolide esterase	macrolide antibiotic	antibiotic inactivation	95.34	100
															Strict	Trimethoprim-resistant dihydrofolate reductase DfrA42		protein homolog model	trimethoprim resistant dihydrofolate reductase dfr	diaminopyrimidine antibiotic	antibiotic target replacement	28.12	94.35
															Strict	lnuC		protein homolog model	lincosamide nucleotidyltransferase (LNU)	lincosamide antibiotic	antibiotic inactivation	98.17
56	ASM1487049v1	Lactobacillus reuteri (firmicutes)	COPD095	PRJNA562766	SAMN12905042	Apr-2015/Sep-2016	Homo sapiens	feces	Australia: Newcastle	n/a	2020-10-08	Contig	1813395	1813395	Strict	Trimethoprim-resistant dihydrofolate reductase DfrA42		protein homolog model	trimethoprim resistant dihydrofolate reductase dfr	diaminopyrimidine antibiotic	antibiotic target replacement	25.98	91.53
57	ASM73629v5	Lacticaseibacillus paracasei (firmicutes)	Lbs2	PRJNA255080	SAMN02910029	2013_10_01	Homo sapiens	gut of person from Indian subcontinent	India	GCF_000736295.1	2018-12-24	Contig	2497121	2497121	Strict	poxtA		protein homolog model	ABC-F ATP-binding cassette ribosomal protection protein	macrolide antibiotic, lincosamide antibiotic, streptogramin antibiotic, tetracycline antibiotic, oxazolidinone antibiotic, phenicol antibiotic, pleuromutilin antibiotic	antibiotic target protection	100	61.07
58	ASM1295548v1	Lacticaseibacillus paracasei (firmicutes)	347-16	PRJNA588921	SAMN13259076	2016	Homo sapiens	feces	Russia: Kislovodsk	GCF_012955485.1	2020-05-03	Complete Genome	3219033	3219033	Strict	poxtA		protein homolog model	ABC-F ATP-binding cassette ribosomal protection protein	macrolide antibiotic, lincosamide antibiotic, streptogramin antibiotic, tetracycline antibiotic, oxazolidinone antibiotic, phenicol antibiotic, pleuromutilin antibiotic	antibiotic target protection	100	61.07
59	ASM836994v1	Lacticaseibacillus paracasei (firmicutes)	DTA93	PRJNA563019	SAMN12661681	2016_10_22	Homo sapiens	Infant feces	Brazil	GCF_008369945.1	2019-09-10	Scaffold	3020118	3018608	Strict	erm(46)		protein homolog model	Erm 23S ribosomal RNA methyltransferase	macrolide antibiotic, lincosamide antibiotic, streptogramin antibiotic	antibiotic target alteration	100	17.78
															Strict	poxtA		protein homolog model	ABC-F ATP-binding cassette ribosomal protection protein	macrolide antibiotic, lincosamide antibiotic, streptogramin antibiotic, tetracycline antibiotic, oxazolidinone antibiotic, phenicol antibiotic, pleuromutilin antibiotic	antibiotic target protection	100	61.07
60	ASM1330712v1	Lacticaseibacillus paracasei (firmicutes)	Lp02	PRJNA534358	SAMN11489091	6_15_2018	Homo sapiens	feces	South Korea:Kyunggi-do	GCF_013307125.1	2020-06-09	Complete Genome	3092262	3092262	Strict	poxtA		protein homolog model	ABC-F ATP-binding cassette ribosomal protection protein	macrolide antibiotic, lincosamide antibiotic, streptogramin antibiotic, tetracycline antibiotic, oxazolidinone antibiotic, phenicol antibiotic, pleuromutilin antibiotic	antibiotic target protection	100	61.07
															Strict	erm(46)		protein homolog model	Erm 23S ribosomal RNA methyltransferase	macrolide antibiotic, lincosamide antibiotic, streptogramin antibiotic	antibiotic target alteration	100	20.37
61	ASM124439v1	Lacticaseibacillus paracasei (firmicutes)	L9	PRJNA289435	SAMN03853751	10_30_2006	Homo sapiens	feces of a centenarian	China: village Bama, guangxi	GCF_001244395.1	2015-08-05	Complete Genome	3076437	3076437	Strict	poxtA		protein homolog model	ABC-F ATP-binding cassette ribosomal protection protein	macrolide antibiotic, lincosamide antibiotic, streptogramin antibiotic, tetracycline antibiotic, oxazolidinone antibiotic, phenicol antibiotic, pleuromutilin antibiotic	antibiotic target protection	100	61.07
															Strict	erm(46)		protein homolog model	Erm 23S ribosomal RNA methyltransferase	macrolide antibiotic, lincosamide antibiotic, streptogramin antibiotic	antibiotic target alteration	100	20.37
62	ASM1484754v1	Lactobacillus ruminis (firmicutes)	UBG090	PRJNA482729	SAMN09684657	2012	Homo sapiens	stool	India: Tamil Nadu	n/a	2020-10-05	Contig	2162743	2162743	Strict	Trimethoprim-resistant dihydrofolate reductase DfrA42		protein homolog model	trimethoprim resistant dihydrofolate reductase dfr	diaminopyrimidine antibiotic	antibiotic target replacement	25.44	119.77
															Strict	Trimethoprim-resistant dihydrofolate reductase DfrA42		protein homolog model	trimethoprim resistant dihydrofolate reductase dfr	diaminopyrimidine antibiotic	antibiotic target replacement	26.45	94.35
63	ASM1484660v1	Lactobacillus ruminis (firmicutes)	UBG141	PRJNA482729	SAMN09684690	2012	Homo sapiens	stool	India: Tamil Nadu	n/a	2020-10-05	Contig	1677769	1677769	Strict	Trimethoprim-resistant dihydrofolate reductase DfrA42		protein homolog model	trimethoprim resistant dihydrofolate reductase dfr	diaminopyrimidine antibiotic	antibiotic target replacement	25.44	119.77
															Strict	Trimethoprim-resistant dihydrofolate reductase DfrA42		protein homolog model	trimethoprim resistant dihydrofolate reductase dfr	diaminopyrimidine antibiotic	antibiotic target replacement	25.81	94.35
64	ASM1484909v1	Limosilactobacillus fermentum (firmicutes)	UBG139	PRJNA482729	SAMN09684688	2012	Homo sapiens	stool	India: Tamil Nadu	n/a	2020-10-05	Contig	1684671	1684671
65	ASM129702v1	Limosilactobacillus fermentum (firmicutes)	HFB3	PRJNA294944	SAMN04038470	29_Nov_2014	Homo sapiens	fecal sample	India: Kangra, Himachal Pradesh	GCF_001297025.1	2015-09-22	Contig	2043356	2043356
66	ASM1224160v1	Lacticaseibacillus paracasei (firmicutes)	DTA81	PRJNA622438	SAMN14517101	22_Oct_2016	Homo sapiens	stool	Brazil	GCF_012241605.1	2020-04-08	Scaffold	3002945	2997404	Strict	poxtA		protein homolog model	ABC-F ATP-binding cassette ribosomal protection protein	macrolide antibiotic, lincosamide antibiotic, streptogramin antibiotic, tetracycline antibiotic, oxazolidinone antibiotic, phenicol antibiotic, pleuromutilin antibiotic	antibiotic target protection	100	61.07
67	ASM982360v1	Lacticaseibacillus paracasei (firmicutes)	DTA72	PRJNA597585	SAMN13679055	22_Oct_2016	Homo sapiens	stool	Brazil	GCF_009823605.1	2019-12-31	Scaffold	3103773	3099735	Strict	poxtA		protein homolog model	ABC-F ATP-binding cassette ribosomal protection protein	macrolide antibiotic, lincosamide antibiotic, streptogramin antibiotic, tetracycline antibiotic, oxazolidinone antibiotic, phenicol antibiotic, pleuromutilin antibiotic	antibiotic target protection	100	61.07
															Strict	OXA-198		protein homolog model	OXA beta-lactamase	carbapenem, cephalosporin, penam	antibiotic inactivation	100	21.76
68	ASM357192v1	Lacticaseibacillus paracasei (firmicutes)	DTA83	PRJNA482862	SAMN09715191	01_JAN_2018	Homo sapiens	stool	Brazil	GCF_003571925.1	2018-09-17	Scaffold	3034380	3033435	Strict	mdsC		protein homolog model	resistance-nodulation-cell division (RND) antibiotic efflux pump	monobactam, carbapenem, cephalosporin, cephamycin, penam, phenicol antibiotic, penem	antibiotic efflux	100	4.17
															Strict	poxtA		protein homolog model	ABC-F ATP-binding cassette ribosomal protection protein	macrolide antibiotic, lincosamide antibiotic, streptogramin antibiotic, tetracycline antibiotic, oxazolidinone antibiotic, phenicol antibiotic, pleuromutilin antibiotic	antibiotic target protection	100	61.07
69	ASM435499v1	Lactiplantibacillus plantarum (firmicutes)	ATCC 202195	PRJNA521530	SAMN11106966	22_Apr_2007	Homo sapiens	Feces	USA: Maryland	GCF_004354995.1	2019-03-18	Scaffold	3327225	3326440
70	ASM975982v1	Lactiplantibacillus plantarum (firmicutes)	83-18	PRJNA594709	SAMN13526687	08_Feb_2017	Homo sapiens	human feces (woman, 60 years old)	Russia	GCF_009759825.1	2019-12-17	Complete Genome	3363821	3363821	Strict	Trimethoprim-resistant dihydrofolate reductase DfrA42		protein homolog model	trimethoprim resistant dihydrofolate reductase dfr	diaminopyrimidine antibiotic	antibiotic target replacement	28.86	92.09
71	ASM975984v1	Lactiplantibacillus plantarum (firmicutes)	123-17	PRJNA594657	SAMN13526508	12_May_2017	Homo sapiens	human feces (woman, 24 years old)	Russia: Kislovodsk	GCF_009759845.1	2019-12-17	Complete Genome	3238595	3238595	Strict	Trimethoprim-resistant dihydrofolate reductase DfrA42		protein homolog model	trimethoprim resistant dihydrofolate reductase dfr	diaminopyrimidine antibiotic	antibiotic target replacement	28.86	92.09
72	ASM1142166v1	Lactiplantibacillus plantarum (firmicutes)	L12	PRJNA520835	SAMN10868586	2014-12	Homo sapiens	feces	India: Punjab	GCF_011421665.1	2020-03-18	Contig	3290978	3290978	Strict	Trimethoprim-resistant dihydrofolate reductase DfrA42		protein homolog model	trimethoprim resistant dihydrofolate reductase dfr	diaminopyrimidine antibiotic	antibiotic target replacement	28.86	92.09
73	ASM431966v1	Lactiplantibacillus plantarum (firmicutes)	IRG1	PRJNA428424	SAMN08290306	2016_10_24	*	Korean infant feces	South Korea: Seoul	GCF_004319665.1	2019-02-28	Complete Genome	3378627	3378627	Strict	Trimethoprim-resistant dihydrofolate reductase DfrA42		protein homolog model	trimethoprim resistant dihydrofolate reductase dfr	diaminopyrimidine antibiotic	antibiotic target replacement	28.86	92.09
74	ASM430186v1	Lactiplantibacillus plantarum (firmicutes)	B14-2	PRJNA358857	SAMN06186648	2014	Homo sapiens	feces	China	GCF_004301865.1	2019-02-26	Scaffold	3169389	3138285	Strict	Trimethoprim-resistant dihydrofolate reductase DfrA42		protein homolog model	trimethoprim resistant dihydrofolate reductase dfr	diaminopyrimidine antibiotic	antibiotic target replacement	28.86	92.09
75	ASM430181v1	Lactiplantibacillus plantarum (firmicutes)	B14-1	PRJNA358857	SAMN06186647	2014	Homo sapiens	feces	China	GCF_004301815.1	2019-02-26	Scaffold	3169719	3138386	Strict	Trimethoprim-resistant dihydrofolate reductase DfrA42		protein homolog model	trimethoprim resistant dihydrofolate reductase dfr	diaminopyrimidine antibiotic	antibiotic target replacement	28.86	92.09
76	ASM430179v1	Lactiplantibacillus plantarum (firmicutes)	B7-2	PRJNA358857	SAMN06186646	2014	Homo sapiens	feces	China	GCF_004301795.1	2019-02-26	Scaffold	3137162	3109064	Strict	Trimethoprim-resistant dihydrofolate reductase DfrA42		protein homolog model	trimethoprim resistant dihydrofolate reductase dfr	diaminopyrimidine antibiotic	antibiotic target replacement	28.86	92.09
77	ASM430180v1	Lactiplantibacillus plantarum (firmicutes)	B7-1	PRJNA358857	SAMN06186645	2014	Homo sapiens	feces	China	GCF_004301805.1	2019-02-26	Scaffold	3136781	3110389	Strict	Trimethoprim-resistant dihydrofolate reductase DfrA42		protein homolog model	trimethoprim resistant dihydrofolate reductase dfr	diaminopyrimidine antibiotic	antibiotic target replacement	28.86	92.09
78	ASM430177v1	Lactiplantibacillus plantarum (firmicutes)	B6-2	PRJNA358857	SAMN06186644	2014	Homo sapiens	feces	China	GCF_004301775.1	2019-02-26	Scaffold	3170357	3137564	Strict	Trimethoprim-resistant dihydrofolate reductase DfrA42		protein homolog model	trimethoprim resistant dihydrofolate reductase dfr	diaminopyrimidine antibiotic	antibiotic target replacement	28.86	92.09
79	ASM430176v1	Lactiplantibacillus plantarum (firmicutes)	B6-1	PRJNA358857	SAMN06186643	2014	Homo sapiens	feces	China	GCF_004301765.1	2019-02-26	Scaffold	3172515	3138173	Strict	Trimethoprim-resistant dihydrofolate reductase DfrA42		protein homolog model	trimethoprim resistant dihydrofolate reductase dfr	diaminopyrimidine antibiotic	antibiotic target replacement	28.86	92.09
80	ASM430172v1	Lactiplantibacillus plantarum (firmicutes)	B5-2	PRJNA358857	SAMN06186642	2014	Homo sapiens	feces	China	GCF_004301725.1	2019-02-26	Scaffold	3169551	3139504	Strict	Trimethoprim-resistant dihydrofolate reductase DfrA42		protein homolog model	trimethoprim resistant dihydrofolate reductase dfr	diaminopyrimidine antibiotic	antibiotic target replacement	28.86	92.09
81	ASM430169v1	Lactiplantibacillus plantarum (firmicutes)	B5-1	PRJNA358857	SAMN06186641	2014	Homo sapiens	feces	China	GCF_004301695.1	2019-02-26	Scaffold	3171771	3139127	Strict	Trimethoprim-resistant dihydrofolate reductase DfrA42		protein homolog model	trimethoprim resistant dihydrofolate reductase dfr	diaminopyrimidine antibiotic	antibiotic target replacement	28.86	92.09
82	ASM430170v1	Lactiplantibacillus plantarum (firmicutes)	B4-2	PRJNA358857	SAMN06186640	2014	Homo sapiens	feces	China	GCF_004301705.1	2019-02-26	Scaffold	3137272	3109245	Strict	Trimethoprim-resistant dihydrofolate reductase DfrA42		protein homolog model	trimethoprim resistant dihydrofolate reductase dfr	diaminopyrimidine antibiotic	antibiotic target replacement	28.86	92.09
83	ASM430168v1	Lactiplantibacillus plantarum (firmicutes)	B4-1	PRJNA358857	SAMN06186639	2014	Homo sapiens	feces	China	GCF_004301685.1	2019-02-26	Scaffold	3170582	3137500	Strict	Trimethoprim-resistant dihydrofolate reductase DfrA42		protein homolog model	trimethoprim resistant dihydrofolate reductase dfr	diaminopyrimidine antibiotic	antibiotic target replacement	28.86	92.09
84	ASM430165v1	Lactiplantibacillus plantarum (firmicutes)	B3-2	PRJNA358857	SAMN06186638	2014	Homo sapiens	feces	China	GCF_004301655.1	2019-02-26	Scaffold	3136804	3109753	Strict	Trimethoprim-resistant dihydrofolate reductase DfrA42		protein homolog model	trimethoprim resistant dihydrofolate reductase dfr	diaminopyrimidine antibiotic	antibiotic target replacement	28.86	92.09
85	ASM430164v1	Lactiplantibacillus plantarum (firmicutes)	B3-1	PRJNA358857	SAMN06186637	2014	Homo sapiens	feces	China	GCF_004301645.1	2019-02-26	Scaffold	3166802	3129900	Strict	Trimethoprim-resistant dihydrofolate reductase DfrA42		protein homolog model	trimethoprim resistant dihydrofolate reductase dfr	diaminopyrimidine antibiotic	antibiotic target replacement	28.86	92.09
86	ASM430156v1	Lactiplantibacillus plantarum (firmicutes)	B2-2	PRJNA358857	SAMN06186636	2014	Homo sapiens	feces	China	GCF_004301565.1	2019-02-26	Scaffold	3168341	3139981	Strict	Trimethoprim-resistant dihydrofolate reductase DfrA42		protein homolog model	trimethoprim resistant dihydrofolate reductase dfr	diaminopyrimidine antibiotic	antibiotic target replacement	28.86	92.09
87	ASM430159v1	Lactiplantibacillus plantarum (firmicutes)	B2-1	PRJNA358857	SAMN06186635	2014	Homo sapiens	feces	China	GCF_004301595.1	2019-02-26	Scaffold	3132725	3112962	Strict	Trimethoprim-resistant dihydrofolate reductase DfrA42		protein homolog model	trimethoprim resistant dihydrofolate reductase dfr	diaminopyrimidine antibiotic	antibiotic target replacement	28.86	92.09
88	ASM430158v1	Lactiplantibacillus plantarum (firmicutes)	B1-2	PRJNA358857	SAMN06186634	2014	Homo sapiens	feces	China	GCF_004301585.1	2019-02-26	Scaffold	3166210	3137733	Strict	Trimethoprim-resistant dihydrofolate reductase DfrA42		protein homolog model	trimethoprim resistant dihydrofolate reductase dfr	diaminopyrimidine antibiotic	antibiotic target replacement	28.86	92.09
89	ASM430154v1	Lactiplantibacillus plantarum (firmicutes)	B1-1	PRJNA358857	SAMN06186633	2014	Homo sapiens	feces	China	GCF_004301545.1	2019-02-26	Scaffold	3133031	3110603	Strict	Trimethoprim-resistant dihydrofolate reductase DfrA42		protein homolog model	trimethoprim resistant dihydrofolate reductase dfr	diaminopyrimidine antibiotic	antibiotic target replacement	28.86	92.09
90	ASM430155v1	Lactiplantibacillus plantarum (firmicutes)	A14-2	PRJNA358857	SAMN06186632	2014	Homo sapiens	feces	China	GCF_004301555.1	2019-02-26	Scaffold	3173167	3139442	Strict	Trimethoprim-resistant dihydrofolate reductase DfrA42		protein homolog model	trimethoprim resistant dihydrofolate reductase dfr	diaminopyrimidine antibiotic	antibiotic target replacement	28.86	92.09
91	ASM430148v1	Lactiplantibacillus plantarum (firmicutes)	A14-1	PRJNA358857	SAMN06186631	2014	Homo sapiens	feces	China	GCF_004301485.1	2019-02-26	Scaffold	3175247	3139721	Strict	Trimethoprim-resistant dihydrofolate reductase DfrA42		protein homolog model	trimethoprim resistant dihydrofolate reductase dfr	diaminopyrimidine antibiotic	antibiotic target replacement	28.86	92.09
92	ASM430145v1	Lactiplantibacillus plantarum (firmicutes)	A7-2	PRJNA358857	SAMN06186630	2014	Homo sapiens	feces	China	GCF_004301455.1	2019-02-26	Scaffold	3172089	3140041	Strict	Trimethoprim-resistant dihydrofolate reductase DfrA42		protein homolog model	trimethoprim resistant dihydrofolate reductase dfr	diaminopyrimidine antibiotic	antibiotic target replacement	28.86	92.09
93	ASM430143v1	Lactiplantibacillus plantarum (firmicutes)	A7-1	PRJNA358857	SAMN06186629	2014	Homo sapiens	feces	China	GCF_004301435.1	2019-02-26	Scaffold	3171853	3140348	Strict	Trimethoprim-resistant dihydrofolate reductase DfrA42		protein homolog model	trimethoprim resistant dihydrofolate reductase dfr	diaminopyrimidine antibiotic	antibiotic target replacement	28.86	92.09
94	ASM430144v1	Lactiplantibacillus plantarum (firmicutes)	A6-2	PRJNA358857	SAMN06186628	2014	Homo sapiens	feces	China	GCF_004301445.1	2019-02-26	Scaffold	3173443	3140838	Strict	Trimethoprim-resistant dihydrofolate reductase DfrA42		protein homolog model	trimethoprim resistant dihydrofolate reductase dfr	diaminopyrimidine antibiotic	antibiotic target replacement	28.86	92.09
95	ASM430139v1	Lactiplantibacillus plantarum (firmicutes)	A5-2	PRJNA358857	SAMN06186626	2014	Homo sapiens	feces	China	GCF_004301395.1	2019-02-26	Scaffold	3179858	3140674	Strict	Trimethoprim-resistant dihydrofolate reductase DfrA42		protein homolog model	trimethoprim resistant dihydrofolate reductase dfr	diaminopyrimidine antibiotic	antibiotic target replacement	28.86	92.09
96	ASM430135v1	Lactiplantibacillus plantarum (firmicutes)	A5-1	PRJNA358857	SAMN06186625	2014	Homo sapiens	feces	China	GCF_004301355.1	2019-02-26	Scaffold	3171048	3137339	Strict	Trimethoprim-resistant dihydrofolate reductase DfrA42		protein homolog model	trimethoprim resistant dihydrofolate reductase dfr	diaminopyrimidine antibiotic	antibiotic target replacement	28.86	92.09
97	ASM430134v1	Lactiplantibacillus plantarum (firmicutes)	A4-2	PRJNA358857	SAMN06186624	2014	Homo sapiens	feces	China	GCF_004301345.1	2019-02-26	Scaffold	3171526	3139915	Strict	Trimethoprim-resistant dihydrofolate reductase DfrA42		protein homolog model	trimethoprim resistant dihydrofolate reductase dfr	diaminopyrimidine antibiotic	antibiotic target replacement	28.86	92.09
98	ASM430133v1	Lactiplantibacillus plantarum (firmicutes)	A4-1	PRJNA358857	SAMN06186623	2014	Homo sapiens	feces	China	GCF_004301335.1	2019-02-26	Scaffold	3173812	3138541	Strict	Trimethoprim-resistant dihydrofolate reductase DfrA42		protein homolog model	trimethoprim resistant dihydrofolate reductase dfr	diaminopyrimidine antibiotic	antibiotic target replacement	28.86	92.09
99	ASM430132v1	Lactiplantibacillus plantarum (firmicutes)	A3-2	PRJNA358857	SAMN06186622	2014	Homo sapiens	feces	China	GCF_004301325.1	2019-02-26	Scaffold	3172851	3143433	Strict	Trimethoprim-resistant dihydrofolate reductase DfrA42		protein homolog model	trimethoprim resistant dihydrofolate reductase dfr	diaminopyrimidine antibiotic	antibiotic target replacement	28.86	92.09
100	ASM430130v1	Lactiplantibacillus plantarum (firmicutes)	A3-1	PRJNA358857	SAMN06186621	2014	Homo sapiens	feces	China	GCF_004301305.1	2019-02-26	Scaffold	3175351	3143871	Strict	Trimethoprim-resistant dihydrofolate reductase DfrA42		protein homolog model	trimethoprim resistant dihydrofolate reductase dfr	diaminopyrimidine antibiotic	antibiotic target replacement	28.86	92.09
101	ASM430125v1	Lactiplantibacillus plantarum (firmicutes)	A2-2	PRJNA358857	SAMN06186620	2014	Homo sapiens	feces	China	GCF_004301255.1	2019-02-26	Scaffold	3177820	3135538	Strict	Trimethoprim-resistant dihydrofolate reductase DfrA42		protein homolog model	trimethoprim resistant dihydrofolate reductase dfr	diaminopyrimidine antibiotic	antibiotic target replacement	28.86	92.09
102	ASM430123v1	Lactiplantibacillus plantarum (firmicutes)	A2-1	PRJNA358857	SAMN06186619	2014	Homo sapiens	feces	China	GCF_004301235.1	2019-02-26	Scaffold	3174565	3131160	Strict	Trimethoprim-resistant dihydrofolate reductase DfrA42		protein homolog model	trimethoprim resistant dihydrofolate reductase dfr	diaminopyrimidine antibiotic	antibiotic target replacement	28.86	92.09
103	ASM430124v1	Lactiplantibacillus plantarum (firmicutes)	A1-2	PRJNA358857	SAMN06186618	2014	Homo sapiens	feces	China	GCF_004301245.1	2019-02-26	Scaffold	3171220	3144641	Strict	Trimethoprim-resistant dihydrofolate reductase DfrA42		protein homolog model	trimethoprim resistant dihydrofolate reductase dfr	diaminopyrimidine antibiotic	antibiotic target replacement	28.86	92.09
104	ASM430122v1	Lactiplantibacillus plantarum (firmicutes)	A1-1	PRJNA358857	SAMN06186617	2014	Homo sapiens	feces	China	GCF_004301225.1	2019-02-26	Scaffold	3173980	3145036	Strict	Trimethoprim-resistant dihydrofolate reductase DfrA42		protein homolog model	trimethoprim resistant dihydrofolate reductase dfr	diaminopyrimidine antibiotic	antibiotic target replacement	28.86	92.09
105	ASM430120v1	Lactiplantibacillus plantarum (firmicutes)	Y2-5	PRJNA358857	SAMN06186616	2014	Homo sapiens	feces	China	GCF_004301205.1	2019-02-26	Scaffold	3078034	3077100	Strict	Trimethoprim-resistant dihydrofolate reductase DfrA42		protein homolog model	trimethoprim resistant dihydrofolate reductase dfr	diaminopyrimidine antibiotic	antibiotic target replacement	28.86	92.09
106	ASM430115v1	Lactiplantibacillus plantarum (firmicutes)	Y2-4	PRJNA358857	SAMN06186615	2014	Homo sapiens	feces	China	GCF_004301155.1	2019-02-26	Scaffold	3089157	3063155	Strict	Trimethoprim-resistant dihydrofolate reductase DfrA42		protein homolog model	trimethoprim resistant dihydrofolate reductase dfr	diaminopyrimidine antibiotic	antibiotic target replacement	28.86	92.09
107	ASM430142v1	Lactiplantibacillus plantarum (firmicutes)	A6-1	PRJNA358857	SAMN06186627	2014	Homo sapiens	feces	China	GCF_004301425.1	2019-02-26	Scaffold	3172647	3140644	Strict	Trimethoprim-resistant dihydrofolate reductase DfrA42		protein homolog model	trimethoprim resistant dihydrofolate reductase dfr	diaminopyrimidine antibiotic	antibiotic target replacement	28.86	92.09
108	ASM430113v1	Lactiplantibacillus plantarum (firmicutes)	Y2-1	PRJNA358857	SAMN06186612	2014	Homo sapiens	feces	China	GCF_004301135.1	2019-02-26	Scaffold	3035011	3033784	Strict	Trimethoprim-resistant dihydrofolate reductase DfrA42		protein homolog model	trimethoprim resistant dihydrofolate reductase dfr	diaminopyrimidine antibiotic	antibiotic target replacement	28.86	92.09
109	ASM430107v1	Lactiplantibacillus plantarum (firmicutes)	M4-4	PRJNA358857	SAMN06186611	2014	Homo sapiens	feces	China	GCF_004301075.1	2019-02-26	Scaffold	3122962	3120975	Strict	Trimethoprim-resistant dihydrofolate reductase DfrA42		protein homolog model	trimethoprim resistant dihydrofolate reductase dfr	diaminopyrimidine antibiotic	antibiotic target replacement	28.86	92.09
110	ASM430105v1	Lactiplantibacillus plantarum (firmicutes)	M4-3	PRJNA358857	SAMN06186610	2014	Homo sapiens	feces	China	GCF_004301055.1	2019-02-26	Scaffold	3116145	3114188	Strict	Trimethoprim-resistant dihydrofolate reductase DfrA42		protein homolog model	trimethoprim resistant dihydrofolate reductase dfr	diaminopyrimidine antibiotic	antibiotic target replacement	28.86	92.09
111	ASM430102v1	Lactiplantibacillus plantarum (firmicutes)	M4-2	PRJNA358857	SAMN06186609	2014	Homo sapiens	feces	China	GCF_004301025.1	2019-02-26	Scaffold	3111830	3110081	Strict	Trimethoprim-resistant dihydrofolate reductase DfrA42		protein homolog model	trimethoprim resistant dihydrofolate reductase dfr	diaminopyrimidine antibiotic	antibiotic target replacement	28.86	92.09
112	ASM430104v1	Lactiplantibacillus plantarum (firmicutes)	M4-1	PRJNA358857	SAMN06186608	2014	Homo sapiens	feces	China	GCF_004301045.1	2019-02-26	Scaffold	3118749	3116146	Strict	Trimethoprim-resistant dihydrofolate reductase DfrA42		protein homolog model	trimethoprim resistant dihydrofolate reductase dfr	diaminopyrimidine antibiotic	antibiotic target replacement	28.86	92.09
113	ASM430103v1	Lactiplantibacillus plantarum (firmicutes)	E6-6	PRJNA358857	SAMN06186607	2014	Homo sapiens	feces	China	GCF_004301035.1	2019-02-27	Scaffold	3078857	3077219	Strict	Trimethoprim-resistant dihydrofolate reductase DfrA42		protein homolog model	trimethoprim resistant dihydrofolate reductase dfr	diaminopyrimidine antibiotic	antibiotic target replacement	28.86	92.09
114	ASM430095v1	Lactiplantibacillus plantarum (firmicutes)	E6-5	PRJNA358858	SAMN06186606	2014	Homo sapiens	feces	China	GCF_004300955.1	2019-02-28	Scaffold	3079942	3078800	Strict	Trimethoprim-resistant dihydrofolate reductase DfrA42		protein homolog model	trimethoprim resistant dihydrofolate reductase dfr	diaminopyrimidine antibiotic	antibiotic target replacement	28.86	92.09
115	ASM430094v1	Lactiplantibacillus plantarum (firmicutes)	E6-4	PRJNA358859	SAMN06186605	2014	Homo sapiens	feces	China	GCF_004300945.1	2019-03-01	Scaffold	3078220	3077453	Strict	Trimethoprim-resistant dihydrofolate reductase DfrA42		protein homolog model	trimethoprim resistant dihydrofolate reductase dfr	diaminopyrimidine antibiotic	antibiotic target replacement	28.86	92.09
116	ASM430096v1	Lactiplantibacillus plantarum (firmicutes)	E6-3	PRJNA358860	SAMN06186604	2014	Homo sapiens	feces	China	GCF_004300965.1	2019-03-02	Scaffold	3079297	3077959	Strict	Trimethoprim-resistant dihydrofolate reductase DfrA42		protein homolog model	trimethoprim resistant dihydrofolate reductase dfr	diaminopyrimidine antibiotic	antibiotic target replacement	28.86	92.09
117	ASM430093v1	Lactiplantibacillus plantarum (firmicutes)	E6-2	PRJNA358861	SAMN06186603	2014	Homo sapiens	feces	China	GCF_004300935.1	2019-03-03	Scaffold	3077943	3076618	Strict	Trimethoprim-resistant dihydrofolate reductase DfrA42		protein homolog model	trimethoprim resistant dihydrofolate reductase dfr	diaminopyrimidine antibiotic	antibiotic target replacement	28.86	92.09
118	ASM430092v1	Lactiplantibacillus plantarum (firmicutes)	E6-1	PRJNA358862	SAMN06186602	2014	Homo sapiens	feces	China	GCF_004300925.1	2019-03-04	Scaffold	3,079,957	3078077	Strict	Trimethoprim-resistant dihydrofolate reductase DfrA42		protein homolog model	trimethoprim resistant dihydrofolate reductase dfr	diaminopyrimidine antibiotic	antibiotic target replacement	28.86	92.09
119	ASM430112v1	Lactiplantibacillus plantarum (firmicutes)	Y2-2	PRJNA358863	SAMN06186613	2014	Homo sapiens	feces	China	GCF_004301125.1	2019-03-05	Scaffold	3115057	3106353	Strict	Trimethoprim-resistant dihydrofolate reductase DfrA42		protein homolog model	trimethoprim resistant dihydrofolate reductase dfr	diaminopyrimidine antibiotic	antibiotic target replacement	28.86	92.09
120	ASM430114v1	Lactiplantibacillus plantarum (firmicutes)	Y2-3	PRJNA358864	SAMN06186614	2014	Homo sapiens	feces	China	GCF_004301145.1	2019-03-06	Scaffold	3082060	3077076	Strict	Trimethoprim-resistant dihydrofolate reductase DfrA42		protein homolog model	trimethoprim resistant dihydrofolate reductase dfr	diaminopyrimidine antibiotic	antibiotic target replacement	28.86	92.09
121	ASM167542v1	Lactiplantibacillus plantarum (firmicutes)	TL2766	PRJNA325089	SAMN05219309	19_Jan_2001	Homo sapiens	Healthy adult feces	Japan: Sendai	GCF_001675425.1	2016-06-22	Contig	3303678	3303678	Strict	Trimethoprim-resistant dihydrofolate reductase DfrA42		protein homolog model	trimethoprim resistant dihydrofolate reductase dfr	diaminopyrimidine antibiotic	antibiotic target replacement	28.86	92.09
122	ASM130264v1	Lactiplantibacillus plantarum (firmicutes)	HFC8	PRJNA295007	SAMN04038608	29_Nov_2014	not applicable	faecal sample	India:Kangra, Himachal Pradesh	GCF_001302645.1	2015-09-29	Complete Genome	3405709	3405709	Strict	Trimethoprim-resistant dihydrofolate reductase DfrA42		protein homolog model	trimethoprim resistant dihydrofolate reductase dfr	diaminopyrimidine antibiotic	antibiotic target replacement	28.86	92.09
															Strict	APH(3')-IVa		protein homolog model	APH(3')	aminoglycoside antibiotic	antibiotic inactivation	100	16.03
123	ASM83053v1	Lactiplantibacillus plantarum (firmicutes)	90sk	PRJNA271052	SAMN03272560	2011	Homo sapiens	gut biopsy	Russia: Tver	GCF_000830535.1	2015-01-30	Contig	3371458	3371458	Strict	Trimethoprim-resistant dihydrofolate reductase DfrA42		protein homolog model	trimethoprim resistant dihydrofolate reductase dfr	diaminopyrimidine antibiotic	antibiotic target replacement	28.86	92.09
124	ASM1426929v1	Lactobacillus paragasseri (firmicutes)	UBLG-36	PRJNA655373	SAMN15733757	2015_07_02	Homo sapiens	gut	India: Hyderabad	GCF_014269295.1	2020-08-23	Scaffold	1941912	1938312	Strict	Trimethoprim-resistant dihydrofolate reductase DfrA42		protein homolog model	trimethoprim resistant dihydrofolate reductase dfr	diaminopyrimidine antibiotic	antibiotic target replacement	26.92	95.48
															Strict	poxtA		protein homolog model	ABC-F ATP-binding cassette ribosomal protection protein	macrolide antibiotic, lincosamide antibiotic, streptogramin antibiotic, tetracycline antibiotic, oxazolidinone antibiotic, phenicol antibiotic, pleuromutilin antibiotic	antibiotic target protection	100	81.73
125	LF1_1.0	Lactobacillus fermentum Lf1 (firmicutes)	Lf1	PRJNA198062	SAMN02053534	31_Jan_2007	Homo sapiens	feces	India: Karnal,Haryana	GCF_000472265.1	2013-09-30	Contig	1815647	1815647
126	ASM159561v1	Lactiplantibacillus plantarum (firmicutes)	43-3	PRJNA305628	SAMN04329467	2012	Homo sapiens	feces	Kazakhstan: Aktobe	GCF_001595615.1	2016-03-21	Scaffold	3294478	3294478	Strict	Trimethoprim-resistant dihydrofolate reductase DfrA42		protein homolog model	trimethoprim resistant dihydrofolate reductase dfr	diaminopyrimidine antibiotic	antibiotic target replacement	28.86	92.09
127	ASM159619v1	Lactiplantibacillus plantarum (firmicutes)	E2C2	PRJNA311909	SAMN04490175	2015_11_23	Homo sapiens	human stool	India: Pune	GCF_001596195.1	2016-03-23	Contig	3603563	3603563	Strict	Trimethoprim-resistant dihydrofolate reductase DfrA42		protein homolog model	trimethoprim resistant dihydrofolate reductase dfr	diaminopyrimidine antibiotic	antibiotic target replacement	28.86	92.09
128	ASM148400v1	Lactiplantibacillus plantarum (firmicutes)	LZ95	PRJNA289547	SAMN03854682	15_Oct_2013	Homo sapiens	baby stool	China	GCF_001484005.1	2016-01-04	Complete Genome	3322458	3322458	Strict	Trimethoprim-resistant dihydrofolate reductase DfrA42		protein homolog model	trimethoprim resistant dihydrofolate reductase dfr	diaminopyrimidine antibiotic	antibiotic target replacement	28.86	92.09
129	ASM1345699v1	Lactobacillus crispatus (firmicutes)	B4	PRJNA645741	SAMN15516019	not collected	Homo sapiens	gut	China: Shanghai,Minhang	GCF_013456995.1	2020-07-22	Complete Genome	2039590	2039590	Perfect	vatE		protein homolog model	streptogramin vat acetyltransferase	streptogramin antibiotic	antibiotic inactivation	100	100
															Strict	ErmB		protein homolog model	Erm 23S ribosomal RNA methyltransferase	macrolide antibiotic, lincosamide antibiotic, streptogramin antibiotic	antibiotic target alteration	99.19	100
															Strict	ErmB		protein homolog model	Erm 23S ribosomal RNA methyltransferase	macrolide antibiotic, lincosamide antibiotic, streptogramin antibiotic	antibiotic target alteration	98.66	90.32
															Strict	catA8		protein homolog model	chloramphenicol acetyltransferase (CAT)	phenicol antibiotic	antibiotic inactivation	96.74	100
															Strict	ErmT		protein homolog model	Erm 23S ribosomal RNA methyltransferase	macrolide antibiotic, lincosamide antibiotic, streptogramin antibiotic	antibiotic target alteration	97.93	100.41
															Strict	poxtA		protein homolog model	ABC-F ATP-binding cassette ribosomal protection protein	macrolide antibiotic, lincosamide antibiotic, streptogramin antibiotic, tetracycline antibiotic, oxazolidinone antibiotic, phenicol antibiotic, pleuromutilin antibiotic	antibiotic target protection	100	79.7
															Strict	tet(W/N/W)		protein homolog model	tetracycline-resistant ribosomal protection protein	tetracycline antibiotic	antibiotic target protection	94.2	100.16
															Strict	ErmA		protein homolog model	Erm 23S ribosomal RNA methyltransferase	macrolide antibiotic, lincosamide antibiotic, streptogramin antibiotic	antibiotic target alteration	85.19	100
															Strict	Trimethoprim-resistant dihydrofolate reductase DfrA42		protein homolog model	trimethoprim resistant dihydrofolate reductase dfr	diaminopyrimidine antibiotic	antibiotic target replacement	26.83	95.48
															Strict	ErmY		protein homolog model	Erm 23S ribosomal RNA methyltransferase	macrolide antibiotic, lincosamide antibiotic, streptogramin antibiotic	antibiotic target alteration	100	19.26
130	ASM1342386v1	Lactobacillus mucosae (firmicutes)	A1	PRJNA645733	SAMN15515560	not collected	Homo sapiens	gut	China: Shanghai,Minhang	GCF_013423865.1	2020-07-19	Complete Genome	2175821	2175821	Strict	Trimethoprim-resistant dihydrofolate reductase DfrA42		protein homolog model	trimethoprim resistant dihydrofolate reductase dfr	diaminopyrimidine antibiotic	antibiotic target replacement	25.6	92.66
															Strict	tet(C)		protein homolog model	major facilitator superfamily (MFS) antibiotic efflux pump	tetracycline antibiotic	antibiotic efflux	100	31.31
															Strict	tet(C)		protein homolog model	major facilitator superfamily (MFS) antibiotic efflux pump	tetracycline antibiotic	antibiotic efflux	100	31.31
131	ASM1106543v1	Lactobacillus reuteri (firmicutes)	LMG P-27481	PRJNA577397	SAMN13025177	01_Feb_2016	Homo sapiens	feces	Italy	GCF_011065435.1	2020-03-05	Contig	2016419	2016419	Strict	Trimethoprim-resistant dihydrofolate reductase DfrA42		protein homolog model	trimethoprim resistant dihydrofolate reductase dfr	diaminopyrimidine antibiotic	antibiotic target replacement	26.77	91.53
															Strict	OXA-18		protein homolog model	OXA beta-lactamase	carbapenem, cephalosporin, penam	antibiotic inactivation	100	26.55
															Strict	Bacillus clausii chloramphenicol acetyltransferase		protein homolog model	chloramphenicol acetyltransferase (CAT)	phenicol antibiotic	antibiotic inactivation	100	16.67
															Strict	Bacillus clausii chloramphenicol acetyltransferase		protein homolog model	chloramphenicol acetyltransferase (CAT)	phenicol antibiotic	antibiotic inactivation	100	16.67
132	ASM983438v1	Lactobacillus sp. JM1 (firmicutes)	JM1	PRJNA565619	SAMN12753695	20_May_2017	*	infant feces	China: Harbin	GCF_009834385.1	2020-01-08	Complete Genome	2085415	2085415	Strict	poxtA		protein homolog model	ABC-F ATP-binding cassette ribosomal protection protein	macrolide antibiotic, lincosamide antibiotic, streptogramin antibiotic, tetracycline antibiotic, oxazolidinone antibiotic, phenicol antibiotic, pleuromutilin antibiotic	antibiotic target protection	100	81.73
															Strict	Trimethoprim-resistant dihydrofolate reductase DfrA42		protein homolog model	trimethoprim resistant dihydrofolate reductase dfr	diaminopyrimidine antibiotic	antibiotic target replacement	26.92	95.48
133	ASM1483012v1	Lactobacillus delbrueckii (firmicutes)	HPLF	PRJNA479410	SAMN09536773	2015	Homo sapiens	feces	India: Himachal Pradesh	GCF_014830125.1	2020-09-30	Contig	2022317	2022317	Strict	Trimethoprim-resistant dihydrofolate reductase DfrA42		protein homolog model	trimethoprim resistant dihydrofolate reductase dfr	diaminopyrimidine antibiotic	antibiotic target replacement	28.06	91.53
															Strict	poxtA		protein homolog model	ABC-F ATP-binding cassette ribosomal protection protein	macrolide antibiotic, lincosamide antibiotic, streptogramin antibiotic, tetracycline antibiotic, oxazolidinone antibiotic, phenicol antibiotic, pleuromutilin antibiotic	antibiotic target protection	100	78.04
134	ASM886862v1	Lactobacillus acidophilus (firmicutes)	BIO6307	PRJNA574342	SAMN12856535	missing	Homo sapiens	adult feces	missing	GCF_008868625.1	2019-10-07	Contig	1969767	1969767	Strict	poxtA		protein homolog model	ABC-F ATP-binding cassette ribosomal protection protein	macrolide antibiotic, lincosamide antibiotic, streptogramin antibiotic, tetracycline antibiotic, oxazolidinone antibiotic, phenicol antibiotic, pleuromutilin antibiotic	antibiotic target protection	100	79.52
135	ASM886853v1	Lactobacillus gasseri (firmicutes)	BIO6369	PRJNA574342	SAMN12856538	missing	Homo sapiens	feces	missing	GCF_008868535.1	2019-10-07	Contig	1873142	1873142	Strict	Trimethoprim-resistant dihydrofolate reductase DfrA42		protein homolog model	trimethoprim resistant dihydrofolate reductase dfr	diaminopyrimidine antibiotic	antibiotic target replacement	28.12	95.48
															Strict	poxtA		protein homolog model	ABC-F ATP-binding cassette ribosomal protection protein	macrolide antibiotic, lincosamide antibiotic, streptogramin antibiotic, tetracycline antibiotic, oxazolidinone antibiotic, phenicol antibiotic, pleuromutilin antibiotic	antibiotic target protection	100	82.84
136	ASM972056v1	Lactobacillus rhamnosus (firmicutes)	BIO5326	PRJNA574342	SAMN13344000	missing	Homo sapiens	feces	missing	GCF_009720565.1	2019-11-30	Complete Genome	2,989,570	2989570	Strict	BJP-1		protein homolog model	BJP beta-lactamase	carbapenem	antibiotic inactivation	100	30.27
															Strict	lmrB		protein homolog model	ATP-binding cassette (ABC) antibiotic efflux pump	lincosamide antibiotic	antibiotic efflux	100	12.79
137	ASM883142v1	Lactobacillus rhamnosus (firmicutes)	BIO6870	PRJNA574342	SAMN12856534	missing	Homo sapiens	feces	missing	GCF_008831425.1	2019-10-07	Complete Genome	3006715	3006715	Strict	lmrB		protein homolog model	ATP-binding cassette (ABC) antibiotic efflux pump	lincosamide antibiotic	antibiotic efflux	100	12.79
138	ASM973436v1	Lactobacillus paragasseri (firmicutes)	NCK1347	PRJNA546252	SAMN12739458	2018_10	Homo sapiens	human endoscopy	USA	GCF_009734365.1	2019-12-09	Chromosome	1944204	1944104	Strict	poxtA		protein homolog model	ABC-F ATP-binding cassette ribosomal protection protein	macrolide antibiotic, lincosamide antibiotic, streptogramin antibiotic, tetracycline antibiotic, oxazolidinone antibiotic, phenicol antibiotic, pleuromutilin antibiotic	antibiotic target protection	100	81
															Strict	Trimethoprim-resistant dihydrofolate reductase DfrA42		protein homolog model	trimethoprim resistant dihydrofolate reductase dfr	diaminopyrimidine antibiotic	antibiotic target replacement	26.92	95.48
139	ASM942906v1	Lactobacillus rhamnosus (firmicutes)	IDCC 3201	PRJNA579036	SAMN13091356	2019_10	Infant	feces from breastmilk-fed infant	South Korea: Hwaseong	GCF_009429065.1	2019-10-31	Chromosome	3064363	3064263	Strict	BJP-1		protein homolog model	BJP beta-lactamase	carbapenem	antibiotic inactivation	100	31.29
															Strict	Listeria monocytogenes mprF		protein homolog model	defensin resistant mprF	peptide antibiotic	antibiotic target alteration	100	12.72
															Strict	lmrB		protein homolog model	ATP-binding cassette (ABC) antibiotic efflux pump	lincosamide antibiotic	antibiotic efflux	100	12.79
140	ASM73525v1	Lactobacillus rhamnosus K32 (firmicutes)	K32	PRJNA191611	SAMN02840977	Sep_2007	Homo sapiens	human gut	Russia: Central Russia	GCF_000735255.1	2014-07-28	Contig	3016919	3016919	Strict	BJP-1		protein homolog model	BJP beta-lactamase	carbapenem	antibiotic inactivation	100	31.29
141	LP1_1.0	Lactobacillus plantarum LP91 (firmicutes)	LP91	PRJNA221362	SAMN02470621	Apr_2008	Homo sapiens	gut	India: Karnal, Haryana	GCF_000473935.1	2013-10-17	Contig	2925584	2925584	Strict	Trimethoprim-resistant dihydrofolate reductase DfrA42		protein homolog model	trimethoprim resistant dihydrofolate reductase dfr	diaminopyrimidine antibiotic	antibiotic target replacement	28.86	92.09
142	ASM395586v1	Lactobacillus helveticus (firmicutes)	LH5	PRJNA356668	SAMN06118452	2002_09_05	Homo sapiens	Human fecal	South Korea	GCF_003955865.1	2018-12-19	Complete Genome	2163678	2163678	Strict	poxtA		protein homolog model	ABC-F ATP-binding cassette ribosomal protection protein	macrolide antibiotic, lincosamide antibiotic, streptogramin antibiotic, tetracycline antibiotic, oxazolidinone antibiotic, phenicol antibiotic, pleuromutilin antibiotic	antibiotic target protection	100	79.34
															Strict	mtrD		protein homolog model	resistance-nodulation-cell division (RND) antibiotic efflux pump	macrolide antibiotic, penam	antibiotic efflux	100	2.81
															Strict	Trimethoprim-resistant dihydrofolate reductase DfrA42		protein homolog model	trimethoprim resistant dihydrofolate reductase dfr	diaminopyrimidine antibiotic	antibiotic target replacement	28.26	99.44
143	ASM101099v1	Lactobacillus brevis (firmicutes)	47f	PRJNA280953	SAMN03470252	2010	Homo sapiens	feces	Russia:Tver	GCF_001010995.1	2015-05-20	Contig	2621559	2621559	Strict	cmlA8		protein homolog model	major facilitator superfamily (MFS) antibiotic efflux pump	phenicol antibiotic	antibiotic efflux	100	17.9
144	ASM143746v1	Lactobacillus saniviri JCM 17471 = DSM 24301 (firmicutes)	DSM 24301	PRJNA222257	SAMN02797787	2012	Homo sapiens	feces	missing	GCF_001437465.1	2015-11-06	Scaffold	2435824	2435519	Strict	Trimethoprim-resistant dihydrofolate reductase DfrA42		protein homolog model	trimethoprim resistant dihydrofolate reductase dfr	diaminopyrimidine antibiotic	antibiotic target replacement	25	100
145	ASM101109v1	Lactobacillus salivarius str. Ren (firmicutes)	Ren	PRJNA247452	SAMN02584770	2005	Homo sapiens	human feces	China: Guangxi	GCF_001011095.1	2015-05-21	Complete Genome	1978364	1978364	Strict	myrA		protein homolog model	non-erm 23S ribosomal RNA methyltransferase (G748)	macrolide antibiotic, lincosamide antibiotic	antibiotic target alteration	100	18.31
146	ASM41041v1	Lactobacillus paracasei subsp. paracasei Lpp37 (firmicutes)	Lpp37	PRJNA178438	SAMN02469718	1994	Homo sapiens	feces	missing	GCF_000410415.1	2013-06-11	Contig	2978454	2978454	Strict	poxtA		protein homolog model	ABC-F ATP-binding cassette ribosomal protection protein	macrolide antibiotic, lincosamide antibiotic, streptogramin antibiotic, tetracycline antibiotic, oxazolidinone antibiotic, phenicol antibiotic, pleuromutilin antibiotic	antibiotic target protection	100	61.07
147	ASM41001v1	Lactobacillus paracasei subsp. paracasei Lpp221 (firmicutes)	Lpp221	PRJNA178437	SAMN02469717	2008	Homo sapiens	feces	missing	GCF_000410015.1	2013-06-11	Contig	3044896	3044896	Strict	poxtA		protein homolog model	ABC-F ATP-binding cassette ribosomal protection protein	macrolide antibiotic, lincosamide antibiotic, streptogramin antibiotic, tetracycline antibiotic, oxazolidinone antibiotic, phenicol antibiotic, pleuromutilin antibiotic	antibiotic target protection	100	61.07
															Strict	APH(2'')-Ie		protein homolog model	APH(2'')	aminoglycoside antibiotic	antibiotic inactivation	100	24.92
															Strict	APH(2'')-Ie		protein homolog model	APH(2'')	aminoglycoside antibiotic	antibiotic inactivation	100	24.92
															Strict	bacA		protein homolog model	undecaprenyl pyrophosphate related proteins	peptide antibiotic	antibiotic target alteration	100	68.13
148	ASM41019v1	Lactobacillus paracasei subsp. paracasei Lpp219 (firmicutes)	Lpp219	PRJNA178423	SAMN02469710	2008	Homo sapiens	feces	missing	GCF_000410195.1	2013-06-11	Contig	3059079	3059079	Strict	poxtA		protein homolog model	ABC-F ATP-binding cassette ribosomal protection protein	macrolide antibiotic, lincosamide antibiotic, streptogramin antibiotic, tetracycline antibiotic, oxazolidinone antibiotic, phenicol antibiotic, pleuromutilin antibiotic	antibiotic target protection	100	61.07
149	L.paracasei Lpp223.v.1	Lactobacillus paracasei subsp. paracasei Lpp223 (firmicutes)	Lpp223	PRJNA178453	SAMN02469706	2008	Homo sapiens	feces	missing	GCF_000409955.1	2013-06-11	Contig	3052108	3052108	Strict	poxtA		protein homolog model	ABC-F ATP-binding cassette ribosomal protection protein	macrolide antibiotic, lincosamide antibiotic, streptogramin antibiotic, tetracycline antibiotic, oxazolidinone antibiotic, phenicol antibiotic, pleuromutilin antibiotic	antibiotic target protection	100	61.07
															Strict	APH(2'')-Ie		protein homolog model	APH(2'')	aminoglycoside antibiotic	antibiotic inactivation	100	24.92
150	ASM143655v1	Lactobacillus senioris DSM 24302 = JCM 17472 (firmicutes)	DSM 24302	PRJNA222257	SAMN02369415	2012	Homo sapiens	feces of a healthy 100-year-old Japanese female	Japan	GCF_001436555.1	2015-11-06	Scaffold	1566789	1566713	Strict	Trimethoprim-resistant dihydrofolate reductase DfrA42		protein homolog model	trimethoprim resistant dihydrofolate reductase dfr	diaminopyrimidine antibiotic	antibiotic target replacement	29.84	93.79
151	UMGS896	uncultured Lactobacillus sp. (firmicutes)	UMGS896	PRJEB26432	SAMEA4891543	missing	Homo sapiens	human gut	missing	n/a	2019-01-29	Contig	1647230	1647230	Strict	poxtA		protein homolog model	ABC-F ATP-binding cassette ribosomal protection protein	macrolide antibiotic, lincosamide antibiotic, streptogramin antibiotic, tetracycline antibiotic, oxazolidinone antibiotic, phenicol antibiotic, pleuromutilin antibiotic	antibiotic target protection	100	76.75
152	UMGS2022	uncultured Lactobacillus sp. (firmicutes)	UMGS2022	PRJEB26432	SAMEA4892610	missing	Homo sapiens	human gut	missing	n/a	2019-01-29	Contig	1195586	1195586	Strict	poxtA		protein homolog model	ABC-F ATP-binding cassette ribosomal protection protein	macrolide antibiotic, lincosamide antibiotic, streptogramin antibiotic, tetracycline antibiotic, oxazolidinone antibiotic, phenicol antibiotic, pleuromutilin antibiotic	antibiotic target protection	100	86.9
153	UMGS258	uncultured Lactobacillus sp. (firmicutes)	UMGS258	PRJEB26432	SAMEA4890939	missing	Homo sapiens	human gut	missing	n/a	2019-01-29	Contig	2470970	2470970	Strict	Trimethoprim-resistant dihydrofolate reductase DfrA42		protein homolog model	trimethoprim resistant dihydrofolate reductase dfr	diaminopyrimidine antibiotic	antibiotic target replacement	29.92	91.53
															Strict	lsaB		protein homolog model	ABC-F ATP-binding cassette ribosomal protection protein	macrolide antibiotic, lincosamide antibiotic, streptogramin antibiotic, tetracycline antibiotic, oxazolidinone antibiotic, phenicol antibiotic, pleuromutilin antibiotic	antibiotic target protection	100	8.54
154	MGS719	Lactobacillus amylovorus CAG:719 (firmicutes)	n/a	PRJEB988	SAMEA3138807	missing	Homo sapiens	derived from human gut metagenome	missing	GCF_000442765.1	2013-07-18	Scaffold	1816655	1815152	Strict	Trimethoprim-resistant dihydrofolate reductase DfrA42		protein homolog model	trimethoprim resistant dihydrofolate reductase dfr	diaminopyrimidine antibiotic	antibiotic target replacement	27.21	94.92
155	MGS367	Lactobacillus ruminis CAG:367 (firmicutes)	n/a	PRJEB852	SAMEA3138490	missing	Homo sapiens	derived from human gut metagenome	missing	GCF_000432055.1	2013-07-17	Scaffold	1953965	1951824	Strict	Trimethoprim-resistant dihydrofolate reductase DfrA42		protein homolog model	trimethoprim resistant dihydrofolate reductase dfr	diaminopyrimidine antibiotic	antibiotic target replacement	25.44	119.77
															Strict	Trimethoprim-resistant dihydrofolate reductase DfrA42		protein homolog model	trimethoprim resistant dihydrofolate reductase dfr	diaminopyrimidine antibiotic	antibiotic target replacement	25.81	94.35
156	ASM584452v1	Lactobacillus gasseri (firmicutes)	1001175st1_D8	PRJNA518912	SAMN10863249	2016_03_14	Homo sapiens	stool	USA	GCF_005844525.1	2019-05-26	Scaffold	1868797	1868188	Strict	Trimethoprim-resistant dihydrofolate reductase DfrA42		protein homolog model	trimethoprim resistant dihydrofolate reductase dfr	diaminopyrimidine antibiotic	antibiotic target replacement	28.12	95.48
															Strict	poxtA		protein homolog model	ABC-F ATP-binding cassette ribosomal protection protein	macrolide antibiotic, lincosamide antibiotic, streptogramin antibiotic, tetracycline antibiotic, oxazolidinone antibiotic, phenicol antibiotic, pleuromutilin antibiotic	antibiotic target protection	100	82.84
157	ASM411475v1	Lactobacillus helveticus (firmicutes)	IDCC3801	PRJNA516087	SAMN10782597	2018_11	Homo sapiens	infant feces	South Korea: Hwaseong	GCF_004114755.1	2019-01-28	Complete Genome	2157253	2157253	Strict	Trimethoprim-resistant dihydrofolate reductase DfrA42		protein homolog model	trimethoprim resistant dihydrofolate reductase dfr	diaminopyrimidine antibiotic	antibiotic target replacement	27.94	97.18
															Strict	poxtA		protein homolog model	ABC-F ATP-binding cassette ribosomal protection protein	macrolide antibiotic, lincosamide antibiotic, streptogramin antibiotic, tetracycline antibiotic, oxazolidinone antibiotic, phenicol antibiotic, pleuromutilin antibiotic	antibiotic target protection	100	79.34
158	ASM416721v1	Lacticaseibacillus paracasei (firmicutes)	co_0103	PRJNA496358	SAMN10239551	2015_01	Homo sapiens	stool	USA: Cambridge	GCF_004167215.1	2019-02-11	Contig	2683607	2683607	Perfect	QnrB19		protein homolog model	quinolone resistance protein (qnr)	fluoroquinolone antibiotic	antibiotic target protection	100	105.61
															Strict	poxtA		protein homolog model	ABC-F ATP-binding cassette ribosomal protection protein	macrolide antibiotic, lincosamide antibiotic, streptogramin antibiotic, tetracycline antibiotic, oxazolidinone antibiotic, phenicol antibiotic, pleuromutilin antibiotic	antibiotic target protection	100	61.07
159	ASM416705v1	Lactobacillus rhamnosus (firmicutes)	co_0103	PRJNA496358	SAMN10239552	2015_01	Homo sapiens	stool	USA: Cambridge	GCF_004167055.1	2019-02-11	Contig	2942745	2942745	Strict	BJP-1		protein homolog model	BJP beta-lactamase	carbapenem	antibiotic inactivation	100	30.27
															Strict	lmrB		protein homolog model	ATP-binding cassette (ABC) antibiotic efflux pump	lincosamide antibiotic	antibiotic efflux	100	12.79
160	ASM416738v1	Lactobacillus ruminis (firmicutes)	bz_0080	PRJNA496358	SAMN10239553	2015_01	Homo sapiens	stool	USA: Cambridge	GCF_004167385.1	2019-02-11	Contig	2128318	2128318	Strict	Trimethoprim-resistant dihydrofolate reductase DfrA42		protein homolog model	trimethoprim resistant dihydrofolate reductase dfr	diaminopyrimidine antibiotic	antibiotic target replacement	25.81	94.35
															Strict	Trimethoprim-resistant dihydrofolate reductase DfrA42		protein homolog model	trimethoprim resistant dihydrofolate reductase dfr	diaminopyrimidine antibiotic	antibiotic target replacement	25.44	119.77
161	ASM412547v1	Lactobacillus rhamnosus (firmicutes)	LR-S	PRJNA422361	SAMN08176640	2017_03	Homo sapiens	stool	Taiwan: Taoyuan	GCF_004125475.1	2019-01-31	Scaffold	2927404	2925078	Strict	lmrB		protein homolog model	ATP-binding cassette (ABC) antibiotic efflux pump	lincosamide antibiotic	antibiotic efflux	100	12.79
162	ASM366648v1	Lactobacillus brevis (firmicutes)	CD0817	PRJNA495163	SAMN10220855	2013_10	*	healthy adult male gut	China: Jiangxi	n/a	2018-10-18	Chromosome	3097074	3096843	Strict	CfxA5		protein homolog model	CfxA beta-lactamase	cephamycin	antibiotic inactivation	100	31.78
															Strict	Trimethoprim-resistant dihydrofolate reductase DfrA42		protein homolog model	trimethoprim resistant dihydrofolate reductase dfr	diaminopyrimidine antibiotic	antibiotic target replacement	23.97	92.09
163	LK71.0	Lactobacillus paragasseri K7 (firmicutes)	K7	PRJNA203137	SAMN02178496	2011_12_22	Homo sapiens	infant feces	Slovenia	GCF_000406345.2	2014-06-12	Scaffold	1994163	1993970	Strict	poxtA		protein homolog model	ABC-F ATP-binding cassette ribosomal protection protein	macrolide antibiotic, lincosamide antibiotic, streptogramin antibiotic, tetracycline antibiotic, oxazolidinone antibiotic, phenicol antibiotic, pleuromutilin antibiotic	antibiotic target protection	100	81.73
															Strict	Trimethoprim-resistant dihydrofolate reductase DfrA42		protein homolog model	trimethoprim resistant dihydrofolate reductase dfr	diaminopyrimidine antibiotic	antibiotic target replacement	26.92	95.48
164	ASM343420v1	Lacticaseibacillus paracasei (firmicutes)	AM33-2AC	PRJNA482748	SAMN09736452	2013_12_01	Homo sapiens	feces	China: Shenzhen	GCF_003434205.1	2018-08-31	Scaffold	3057462	3056433	Strict	poxtA		protein homolog model	ABC-F ATP-binding cassette ribosomal protection protein	macrolide antibiotic, lincosamide antibiotic, streptogramin antibiotic, tetracycline antibiotic, oxazolidinone antibiotic, phenicol antibiotic, pleuromutilin antibiotic	antibiotic target protection	100	61.07
165	ASM347076v1	Lactiplantibacillus plantarum (firmicutes)	AM25-20AC	PRJNA482748	SAMN09736307	2013_11_01	Homo sapiens	feces	China: Shenzhen	GCF_003470765.1	2018-09-06	Scaffold	3287535	3287358	Strict	Trimethoprim-resistant dihydrofolate reductase DfrA42		protein homolog model	trimethoprim resistant dihydrofolate reductase dfr	diaminopyrimidine antibiotic	antibiotic target replacement	28.86	92.09
															Strict	rmtC		protein homolog model	16S rRNA methyltransferase (G1405)	aminoglycoside antibiotic	antibiotic target alteration	100	14.59
166	ASM346980v1	Lactiplantibacillus plantarum (firmicutes)	AM25-25	PRJNA482748	SAMN09736312	2013_11_01	Homo sapiens	feces	China: Shenzhen	GCF_003469805.1	2018-09-06	Scaffold	3263560	3262808	Strict	Trimethoprim-resistant dihydrofolate reductase DfrA42		protein homolog model	trimethoprim resistant dihydrofolate reductase dfr	diaminopyrimidine antibiotic	antibiotic target replacement	28.86	92.09
															Strict	poxtA		protein homolog model	ABC-F ATP-binding cassette ribosomal protection protein	macrolide antibiotic, lincosamide antibiotic, streptogramin antibiotic, tetracycline antibiotic, oxazolidinone antibiotic, phenicol antibiotic, pleuromutilin antibiotic	antibiotic target protection	100	62.36
167	ASM346590v1	Lactobacillus amylovorus (firmicutes)	AF08-3	PRJNA482748	SAMN09734196	2013_07_01	Homo sapiens	feces	China: Shenzhen	GCF_003465905.1	2018-09-06	Scaffold	2049854	2049624	Strict	Trimethoprim-resistant dihydrofolate reductase DfrA42		protein homolog model	trimethoprim resistant dihydrofolate reductase dfr	diaminopyrimidine antibiotic	antibiotic target replacement	27.21	94.92
															Strict	tet(W/N/W)		protein homolog model	tetracycline-resistant ribosomal protection protein	tetracycline antibiotic	antibiotic target protection	94.51	100.63
168	ASM343705v1	Lactobacillus gasseri (firmicutes)	TF08-1	PRJNA482748	SAMN09736911	2014_02_01	Homo sapiens	feces	China: Shenzhen	GCF_003437055.1	2018-08-31	Scaffold	1974590	1974540	Strict	Trimethoprim-resistant dihydrofolate reductase DfrA42		protein homolog model	trimethoprim resistant dihydrofolate reductase dfr	diaminopyrimidine antibiotic	antibiotic target replacement	28.12	95.48
															Strict	poxtA		protein homolog model	ABC-F ATP-binding cassette ribosomal protection protein	macrolide antibiotic, lincosamide antibiotic, streptogramin antibiotic, tetracycline antibiotic, oxazolidinone antibiotic, phenicol antibiotic, pleuromutilin antibiotic	antibiotic target protection	100	82.84
169	ASM343683v1	Lactobacillus ruminis (firmicutes)	TF10-9AT	PRJNA482748	SAMN09736943	2014_02_01	Homo sapiens	feces	China: Shenzhen	GCF_003436835.1	2018-08-31	Scaffold	2171083	2170983	Strict	Trimethoprim-resistant dihydrofolate reductase DfrA42		protein homolog model	trimethoprim resistant dihydrofolate reductase dfr	diaminopyrimidine antibiotic	antibiotic target replacement	25.81	94.35
															Strict	ANT(2'')-Ia		protein homolog model	ANT(2'')	aminoglycoside antibiotic	antibiotic inactivation	100	19.77
															Strict	SatA		protein homolog model	streptothricin acetyltransferase (SAT)	nucleoside antibiotic	antibiotic inactivation	100	79.89
															Strict	Trimethoprim-resistant dihydrofolate reductase DfrA42		protein homolog model	trimethoprim resistant dihydrofolate reductase dfr	diaminopyrimidine antibiotic	antibiotic target replacement	25.44	119.77
170	ASM343859v1	Ligilactobacillus salivarius (firmicutes)	OM08-20	PRJNA482748	SAMN09736856	2014_02_01	Homo sapiens	feces	China: Shenzhen	GCF_003438595.1	2018-08-31	Scaffold	2011057	2010737
171	ASM347261v1	Ligilactobacillus salivarius (firmicutes)	AM09-40	PRJNA482748	SAMN09734758	2012_11_01	Homo sapiens	feces	China: Shenzhen	GCF_003472615.1	2018-09-06	Scaffold	1888841	1888771	Strict	PNGM-1		protein homolog model	PNGM beta-lactamase	carbapenem, cephalosporin, penam	antibiotic inactivation	100	10.62
															Strict	myrA		protein homolog model	non-erm 23S ribosomal RNA methyltransferase (G748)	macrolide antibiotic, lincosamide antibiotic	antibiotic target alteration	100	17.63
172	ASM347014v1	Ligilactobacillus salivarius (firmicutes)	AM25-8	PRJNA482748	SAMN09736323	2013_11_01	Homo sapiens	feces	China: Shenzhen	GCF_003470145.1	2018-09-06	Scaffold	1969489	1969088
173	ASM346428v1	Limosilactobacillus fermentum (firmicutes)	AF15-40LB	PRJNA482748	SAMN09734289	2013_11_01	Homo sapiens	feces	China: Shenzhen	GCF_003464285.1	2018-09-06	Scaffold	1968193	1967637
174	ASM346508v1	Limosilactobacillus fermentum (firmicutes)	AF11-4-H	PRJNA482748	SAMN09734212	2013_09_01	Homo sapiens	feces	China: Shenzhen	GCF_003465085.1	2018-09-07	Scaffold	1935804	1935484
175	ASM346275v1	Limosilactobacillus fermentum (firmicutes)	AF16-22LB	PRJNA482748	SAMN09734308	2013_11_01	Homo sapiens	feces	China: Shenzhen	GCF_003462755.1	2018-09-08	Scaffold	1996988	1996550
176	ASM342839v1	Lactobacillus johnsonii (firmicutes)	IDCC9203	PRJNA486604	SAMN09858432	July_2018	Homo sapiens	Infant feces	South Korea: Gyeonggi	GCF_003428395.1	2018-08-26	Complete Genome	1898461	1898461	Strict	Trimethoprim-resistant dihydrofolate reductase DfrA42		protein homolog model	trimethoprim resistant dihydrofolate reductase dfr	diaminopyrimidine antibiotic	antibiotic target replacement	27.91	94.35
															Strict	poxtA		protein homolog model	ABC-F ATP-binding cassette ribosomal protection protein	macrolide antibiotic, lincosamide antibiotic, streptogramin antibiotic, tetracycline antibiotic, oxazolidinone antibiotic, phenicol antibiotic, pleuromutilin antibiotic	antibiotic target protection	100	81.55
															Strict	tet(W/N/W)		protein homolog model	tetracycline-resistant ribosomal protection protein	tetracycline antibiotic	antibiotic target protection	94.83	100
177	ASM335345v1	Lactobacillus rhamnosus GG (firmicutes)	GG	PRJNA481623	SAMN09685158	12_Aug_2016	Homo sapiens	feces	South Korea: Gyeonggi	GCF_003353455.1	2018-08-02	Complete Genome	3010116	3010116	Strict	lmrB		protein homolog model	ATP-binding cassette (ABC) antibiotic efflux pump	lincosamide antibiotic	antibiotic efflux	100	12.79
178	ASM351380v1	Lactobacillus sp. (firmicutes)	UBA10789	PRJNA417962	SAMN08019283	not applicable	Homo sapiens	Human gut stool	missing	n/a	2018-09-07	Scaffold	1827345	1827206
179	ASM345259v1	Lactobacillus sp. (firmicutes)	UBA10794	PRJNA417962	SAMN08017922	not applicable	Homo sapiens	Human gut stool	missing	n/a	2018-09-05	Scaffold	2156314	2155695	Strict	Trimethoprim-resistant dihydrofolate reductase DfrA42		protein homolog model	trimethoprim resistant dihydrofolate reductase dfr	diaminopyrimidine antibiotic	antibiotic target replacement	25.6	92.66
180	ASM228621v1	Lactobacillus acidophilus (firmicutes)	LA1	PRJNA340059	SAMN05631052	2015_08_25	Homo sapiens	feces	South Korea: Seoul	GCF_002286215.1	2017-09-05	Complete Genome	1991195	1,991,195	Strict	poxtA		protein homolog model	ABC-F ATP-binding cassette ribosomal protection protein	macrolide antibiotic, lincosamide antibiotic, streptogramin antibiotic, tetracycline antibiotic, oxazolidinone antibiotic, phenicol antibiotic, pleuromutilin antibiotic	antibiotic target protection	100	79.52
181	ASM228623v1	Lactobacillus rhamnosus (firmicutes)	LR5	PRJNA340067	SAMN05631078	2015_08_24	Homo sapiens	feces	South Korea: Seoul	GCF_002286235.1	2017-09-05	Complete Genome	2972590	2972590
182	ASM313108v1	Lactobacillus kefiri (firmicutes)	SGL 13	PRJNA467650	SAMN09088062	2016	Homo sapiens	stool	Italy	GCF_003131085.1	2018-05-18	Scaffold	2570721	2568072	Strict	mdtB		protein homolog model	resistance-nodulation-cell division (RND) antibiotic efflux pump	aminocoumarin antibiotic	antibiotic efflux	100	2.4
183	ASM290116v2	Lactobacillus paracasei subsp. paracasei (firmicutes)	NTU 101	PRJNA396987	SAMN07445234	2013_09_16	Homo sapiens	Feces of infant	Taiwan:Taipei	GCF_002901165.2	2020-06-30	Scaffold	2932855	2924585	Strict	poxtA		protein homolog model	ABC-F ATP-binding cassette ribosomal protection protein	macrolide antibiotic, lincosamide antibiotic, streptogramin antibiotic, tetracycline antibiotic, oxazolidinone antibiotic, phenicol antibiotic, pleuromutilin antibiotic	antibiotic target protection	100	61.07
184	ASM215888v1	Lactobacillus gasseri (firmicutes)	4M13	PRJNA387642	SAMN07160387	2016_05_01	Homo sapiens	infant feces	South Korea: Seoul	GCF_002158885.1	2017-05-30	Complete Genome	2129370	2129370	Strict	Trimethoprim-resistant dihydrofolate reductase DfrA42		protein homolog model	trimethoprim resistant dihydrofolate reductase dfr	diaminopyrimidine antibiotic	antibiotic target replacement	26.92	95.48
															Strict	poxtA		protein homolog model	ABC-F ATP-binding cassette ribosomal protection protein	macrolide antibiotic, lincosamide antibiotic, streptogramin antibiotic, tetracycline antibiotic, oxazolidinone antibiotic, phenicol antibiotic, pleuromutilin antibiotic	antibiotic target protection	100	81.73
185	ASM215892v1	Lactobacillus rhamnosus (firmicutes)	4B15	PRJNA387641	SAMN07160384	2016_05_01	*	infant feces	Korea:Seoul	GCF_002158925.1	2017-05-30	Complete Genome	3047840	3047840	Strict	lmrB		protein homolog model	ATP-binding cassette (ABC) antibiotic efflux pump	lincosamide antibiotic	antibiotic efflux	100	12.79
186	ASM195004v1	Lactobacillus acidophilus (firmicutes)	L-55	PRJDB5198	SAMD00064210	missing	*	healthy infant feces	missing	GCF_001950045.1	2016-10-08	Scaffold	2009507	2009494	Strict	catII from Escherichia coli K-12		protein homolog model	chloramphenicol acetyltransferase (CAT)	phenicol antibiotic	antibiotic inactivation	100	36.62
															Strict	poxtA		protein homolog model	ABC-F ATP-binding cassette ribosomal protection protein	macrolide antibiotic, lincosamide antibiotic, streptogramin antibiotic, tetracycline antibiotic, oxazolidinone antibiotic, phenicol antibiotic, pleuromutilin antibiotic	antibiotic target protection	100	79.52
187	ASM198243v1	Lactobacillus rhamnosus (firmicutes)	AMC010	PRJNA357881	SAMN06161582	2011	Homo sapiens	infant stools	USA	GCF_001982435.1	2017-02-01	Contig	3134772	3134772	Strict	lmrB		protein homolog model	ATP-binding cassette (ABC) antibiotic efflux pump	lincosamide antibiotic	antibiotic efflux	100	12.79
188	ASM198242v1	Lactobacillus rhamnosus (firmicutes)	AMC143	PRJNA357881	SAMN06161581	2010	Homo sapiens	infant stools	USA	GCF_001982425.1	2017-02-01	Contig	2872742	2872742	Strict	OXA-45		protein homolog model	OXA beta-lactamase	carbapenem, cephalosporin, penam	antibiotic inactivation	100	23.48
189	ASM174204v1	Lactobacillus jensenii (firmicutes)	TL2937	PRJNA339464	SAMN05596977	15_Nov_2000	Homo sapiens	Healthy adult feces	Japan: Sendai	GCF_001742045.1	2016-09-22	Contig	1675234	1675234	Strict	poxtA		protein homolog model	ABC-F ATP-binding cassette ribosomal protection protein	macrolide antibiotic, lincosamide antibiotic, streptogramin antibiotic, tetracycline antibiotic, oxazolidinone antibiotic, phenicol antibiotic, pleuromutilin antibiotic	antibiotic target protection	100	80.07
190	ASM165684v1	Lactobacillus rhamnosus (firmicutes)	Lrh5	PRJNA253894	SAMN03196630	not collected	Homo sapiens	feces	not collected	GCF_001656845.1	2016-06-03	Contig	2846072	2846072	Strict	poxtA		protein homolog model	ABC-F ATP-binding cassette ribosomal protection protein	macrolide antibiotic, lincosamide antibiotic, streptogramin antibiotic, tetracycline antibiotic, oxazolidinone antibiotic, phenicol antibiotic, pleuromutilin antibiotic	antibiotic target protection	100	48.89
															Strict	lmrB		protein homolog model	ATP-binding cassette (ABC) antibiotic efflux pump	lincosamide antibiotic	antibiotic efflux	100	12.79
															Strict	lmrB		protein homolog model	ATP-binding cassette (ABC) antibiotic efflux pump	lincosamide antibiotic	antibiotic efflux	100	12.79
191	ASM165660v1	Lactobacillus rhamnosus (firmicutes)	Lrh26	PRJNA253894	SAMN03196629	not collected	Homo sapiens	feces	missing	GCF_001656605.1	2016-06-03	Contig	2993314	2993314	Strict	BJP-1		protein homolog model	BJP beta-lactamase	carbapenem	antibiotic inactivation	100	31.29
															Strict	lmrB		protein homolog model	ATP-binding cassette (ABC) antibiotic efflux pump	lincosamide antibiotic	antibiotic efflux	100	12.79
192	ASM165715v1	Lactobacillus rhamnosus (firmicutes)	Lrh12	PRJNA253894	SAMN03196628	not collected	Homo sapiens	feces	missing	GCF_001657155.1	2016-06-03	Contig	2893798	2893798	Strict	BJP-1		protein homolog model	BJP beta-lactamase	carbapenem	antibiotic inactivation	100	30.27
															Strict	poxtA		protein homolog model	ABC-F ATP-binding cassette ribosomal protection protein	macrolide antibiotic, lincosamide antibiotic, streptogramin antibiotic, tetracycline antibiotic, oxazolidinone antibiotic, phenicol antibiotic, pleuromutilin antibiotic	antibiotic target protection	100	57.38
															Strict	lmrB		protein homolog model	ATP-binding cassette (ABC) antibiotic efflux pump	lincosamide antibiotic	antibiotic efflux	100	12.79
193	ASM165707v1	Lactobacillus rhamnosus (firmicutes)	Lrh17	PRJNA253894	SAMN03196627	not collected	Homo sapiens	feces	missing	GCF_001657075.1	2016-06-03	Contig	2921984	2921984	Strict	lmrB		protein homolog model	ATP-binding cassette (ABC) antibiotic efflux pump	lincosamide antibiotic	antibiotic efflux	100	12.79
194	ASM165702v1	Lactobacillus rhamnosus (firmicutes)	Lrh2	PRJNA253894	SAMN03196626	not collected	Homo sapiens	feces	missing	GCF_001657025.1	2016-06-03	Contig	2800944	2800944	Strict	lmrB		protein homolog model	ATP-binding cassette (ABC) antibiotic efflux pump	lincosamide antibiotic	antibiotic efflux	100	12.79
195	ASM165675v1	Lactobacillus rhamnosus (firmicutes)	Lrh1	PRJNA253894	SAMN03196625	not collected	Homo sapiens	feces	missing	GCF_001656755.1	2016-06-03	Contig	2789800	2789800	Strict	lmrB		protein homolog model	ATP-binding cassette (ABC) antibiotic efflux pump	lincosamide antibiotic	antibiotic efflux	100	12.79
196	ASM165694v1	Lactobacillus rhamnosus (firmicutes)	Lrh27	PRJNA253894	SAMN03196624	not collected	Homo sapiens	feces	missing	GCF_001656945.1	2016-06-03	Contig	3005686	3005686	Strict	BJP-1		protein homolog model	BJP beta-lactamase	carbapenem	antibiotic inactivation	100	31.29
															Strict	lmrB		protein homolog model	ATP-binding cassette (ABC) antibiotic efflux pump	lincosamide antibiotic	antibiotic efflux	100	12.79
197	ASM165699v1	Lactobacillus rhamnosus (firmicutes)	Lrh21	PRJNA253894	SAMN03196623	not collected	Homo sapiens	feces	missing	GCF_001656995.1	2016-06-03	Contig	2955663	2955663	Strict	BJP-1		protein homolog model	BJP beta-lactamase	carbapenem	antibiotic inactivation	100	30.27
															Strict	lmrB		protein homolog model	ATP-binding cassette (ABC) antibiotic efflux pump	lincosamide antibiotic	antibiotic efflux	100	12.79
198	ASM167666v1	Lactobacillus gasseri (firmicutes)	505	PRJNA324721	SAMN05185313	2014	Homo sapiens	feces	South Korea	GCF_001676665.1	2016-06-25	Contig	2090951	2090951	Strict	poxtA		protein homolog model	ABC-F ATP-binding cassette ribosomal protection protein	macrolide antibiotic, lincosamide antibiotic, streptogramin antibiotic, tetracycline antibiotic, oxazolidinone antibiotic, phenicol antibiotic, pleuromutilin antibiotic	antibiotic target protection	100	81.73
															Strict	Trimethoprim-resistant dihydrofolate reductase DfrA42		protein homolog model	trimethoprim resistant dihydrofolate reductase dfr	diaminopyrimidine antibiotic	antibiotic target replacement	26.92	95.48
199	ASM164561v1	Lactobacillus rhamnosus (firmicutes)	R19-3	PRJNA315956	SAMN04366754	2011	Homo sapiens	feces	Kazakhstan: Aktobe	GCF_001645615.1	2016-05-17	Contig	3053014	3053014	Strict	BJP-1		protein homolog model	BJP beta-lactamase	carbapenem	antibiotic inactivation	100	31.29
															Strict	lmrB		protein homolog model	ATP-binding cassette (ABC) antibiotic efflux pump	lincosamide antibiotic	antibiotic efflux	100	12.79
200	ASM131424v2	Lactobacillus gallinarum (firmicutes)	HFD4	PRJNA297274	SAMN04121884	29_Nov_2014	human	faecal sample	India:Kangra, Himachal Pradesh	GCF_001314245.2	2015-10-14	Complete Genome	2374782	2374782	Strict	vanXYG		protein homolog model	glycopeptide resistance gene cluster, vanXY	glycopeptide antibiotic	antibiotic target alteration	100	27.56
															Strict	Trimethoprim-resistant dihydrofolate reductase DfrA42		protein homolog model	trimethoprim resistant dihydrofolate reductase dfr	diaminopyrimidine antibiotic	antibiotic target replacement	27.21	103.39
															Strict	poxtA		protein homolog model	ABC-F ATP-binding cassette ribosomal protection protein	macrolide antibiotic, lincosamide antibiotic, streptogramin antibiotic, tetracycline antibiotic, oxazolidinone antibiotic, phenicol antibiotic, pleuromutilin antibiotic	antibiotic target protection	100	79.34
201	ASM104440v1	Lactobacillus rhamnosus (firmicutes)	40f	PRJNA287246	SAMN03766173	2010	Homo sapiens	feces	Russia: central region	GCF_001044405.1	2015-07-01	Contig	3127473	3127473	Strict	BJP-1		protein homolog model	BJP beta-lactamase	carbapenem	antibiotic inactivation	100	31.29
															Strict	lmrB		protein homolog model	ATP-binding cassette (ABC) antibiotic efflux pump	lincosamide antibiotic	antibiotic efflux	100	12.79
202	ASM104401v1	Lactobacillus rhamnosus (firmicutes)	Lr071	PRJNA253894	SAMN03196657	not collected	Homo sapiens	feces	missing	GCF_001044015.1	2015-07-01	Contig	2827712	2827712	Strict	lmrB		protein homolog model	ATP-binding cassette (ABC) antibiotic efflux pump	lincosamide antibiotic	antibiotic efflux	100	12.79
															Strict	ErmR		protein homolog model	Erm 23S ribosomal RNA methyltransferase	macrolide antibiotic, lincosamide antibiotic, streptogramin antibiotic	antibiotic target alteration	100	17.06
															Strict	cmlv		protein homolog model	chloramphenicol phosphotransferase	phenicol antibiotic	antibiotic inactivation	100	7.34
203	ASM104399v1	Lactobacillus rhamnosus (firmicutes)	Lr073	PRJNA253894	SAMN03196656	not collected	Homo sapiens	feces	missing	GCF_001043995.1	2015-07-01	Contig	2814449	2814449	Strict	BJP-1		protein homolog model	BJP beta-lactamase	carbapenem	antibiotic inactivation	100	30.27
															Strict	AAC(3)-IIe		protein homolog model	AAC(3)	aminoglycoside antibiotic	antibiotic inactivation	100	18.18
															Strict	lmrB		protein homolog model	ATP-binding cassette (ABC) antibiotic efflux pump	lincosamide antibiotic	antibiotic efflux	100	12.79
204	ASM98042v1	Lactobacillus sp. N15.MGS-260 (firmicutes)	N15.MGS-260	PRJNA277012	SAMN03450002	missing	Homo sapiens	stool sample from 52 year old healthy male	missing	n/a	2015-04-24	Contig	1820858	1820858	Strict	adeF		protein homolog model	resistance-nodulation-cell division (RND) antibiotic efflux pump	fluoroquinolone antibiotic, tetracycline antibiotic	antibiotic efflux	44.06	99.91
205	ASM98050v1	Lactobacillus sp. N54.MGS-719 (firmicutes)	N54.MGS-719	PRJNA277012	SAMN03450008	missing	Homo sapiens	stool sample from 53 year old healthy female	missing	GCF_000980505.1	2015-04-24	Contig	1821790	1821790	Strict	Trimethoprim-resistant dihydrofolate reductase DfrA42		protein homolog model	trimethoprim resistant dihydrofolate reductase dfr	diaminopyrimidine antibiotic	antibiotic target replacement	27.21	94.92
															Strict	tetW		protein homolog model	tetracycline-resistant ribosomal protection protein	tetracycline antibiotic	antibiotic target protection	100	22.38
206	Lac_rha231	Lactobacillus rhamnosus LR231 (firmicutes)	LR231	PRJNA222567	SAMN02469586	missing	Homo sapiens	human feces	India	GCF_000508405.1	2013-12-16	Contig	2592265	2592265	Strict	lmrB		protein homolog model	ATP-binding cassette (ABC) antibiotic efflux pump	lincosamide antibiotic	antibiotic efflux	100	12.79
207	ASM101337v1	Lactobacillus casei (firmicutes)	N87	PRJNA282947	SAMN03580836	02_Apr_2012	Homo sapiens	Infant feces	Italy: Campobasso	GCF_001013375.1	2015-05-26	Contig	3001027	3001027	Strict	Trimethoprim-resistant dihydrofolate reductase DfrA42		protein homolog model	trimethoprim resistant dihydrofolate reductase dfr	diaminopyrimidine antibiotic	antibiotic target replacement	28.1	92.09
208	ASM93203v1	Lactobacillus rhamnosus (firmicutes)	CLS17	PRJNA264249	SAMN03120606	04_Apr_2012	Homo sapiens	stool sample	Kazakhstan: Astana	GCF_000932035.1	2015-02-24	Contig	2889314	2889314	Strict	lmrB		protein homolog model	ATP-binding cassette (ABC) antibiotic efflux pump	lincosamide antibiotic	antibiotic efflux	100	12.79
209	ASM87590v1	Lactobacillus brevis (firmicutes)	15f	PRJNA269010	SAMN03247579	2010	Homo sapiens	feces from a healthy adult female	Russia: Tver	GCF_000875905.1	2015-02-13	Scaffold	2435429	2435429
210	ASM80104v1	Lactobacillus rhamnosus (firmicutes)	116	PRJNA265918	SAMN03154065	1994	Homo sapiens	feces from gastrointestinal tract of a healthy adult female	Russia	GCF_000801045.1	2014-12-11	Contig	2966235	2966235
211	L35	Lactobacillus rhamnosus L35 (firmicutes)	L35	PRJNA217082	SAMN02324556	missing	Homo sapiens	infant feces	Thailand: Bangkok	GCF_000784395.1	2014-11-17	Contig	2937403	2937403	Strict	lmrB		protein homolog model	ATP-binding cassette (ABC) antibiotic efflux pump	lincosamide antibiotic	antibiotic efflux	100	12.79
212	L34	Lactobacillus rhamnosus L34 (firmicutes)	L34	PRJNA217081	SAMN02324555	missing	Homo sapiens	infant feces	Thailand: Bangkok	GCF_000784375.1	2014-11-17	Contig	2937717	2937717	Strict	lmrB		protein homolog model	ATP-binding cassette (ABC) antibiotic efflux pump	lincosamide antibiotic	antibiotic efflux	100	12.79
213	L31	Lactobacillus rhamnosus L31 (firmicutes)	L31	PRJNA217079	SAMN02324553	missing	Homo sapiens	infant feces	Thailand: Bangkok	GCF_000784405.1	2014-11-17	Contig	2826754	2826754	Strict	BJP-1		protein homolog model	BJP beta-lactamase	carbapenem	antibiotic inactivation	100	31.29
															Strict	lmrB		protein homolog model	ATP-binding cassette (ABC) antibiotic efflux pump	lincosamide antibiotic	antibiotic efflux	100	12.79
214	ASM76690v1	Lactobacillus mucosae (firmicutes)	CRL573	PRJNA262170	SAMN03081593	1984	Homo sapiens	feces from children	Argentina: Tucuman	GCF_000766905.1	2014-10-14	Contig	2257701	2257701	Strict	poxtA		protein homolog model	ABC-F ATP-binding cassette ribosomal protection protein	macrolide antibiotic, lincosamide antibiotic, streptogramin antibiotic, tetracycline antibiotic, oxazolidinone antibiotic, phenicol antibiotic, pleuromutilin antibiotic	antibiotic target protection	100	48.15
															Strict	Trimethoprim-resistant dihydrofolate reductase DfrA42		protein homolog model	trimethoprim resistant dihydrofolate reductase dfr	diaminopyrimidine antibiotic	antibiotic target replacement	25.6	92.66
215	UHGG_MGYG-HGUT-02388	Lacticaseibacillus paracasei (firmicutes)	MGYG-HGUT-02388	PRJEB33885	SAMEA5851892	missing	Homo sapiens	human gut	China	GCF_902386635.1	2019-08-10	Complete Genome	3076437	3076437	Strict	poxtA		protein homolog model	ABC-F ATP-binding cassette ribosomal protection protein	macrolide antibiotic, lincosamide antibiotic, streptogramin antibiotic, tetracycline antibiotic, oxazolidinone antibiotic, phenicol antibiotic, pleuromutilin antibiotic	antibiotic target protection	100	61.07
															Strict	erm(46)		protein homolog model	Erm 23S ribosomal RNA methyltransferase	macrolide antibiotic, lincosamide antibiotic, streptogramin antibiotic	antibiotic target alteration	100	20.37
216	UHGG_MGYG-HGUT-02386	Lactiplantibacillus plantarum (firmicutes)	MGYG-HGUT-02386	PRJEB33885	SAMEA5851890	missing	Homo sapiens	human gut	China	GCF_902386645.1	2019-08-16	Contig	3412302	3412302	Strict	Trimethoprim-resistant dihydrofolate reductase DfrA42		protein homolog model	trimethoprim resistant dihydrofolate reductase dfr	diaminopyrimidine antibiotic	antibiotic target replacement	28.86	92.09
217	UHGG_MGYG-HGUT-02379	Lactobacillus acidophilus (firmicutes)	MGYG-HGUT-02379	PRJEB33885	SAMEA5851883	missing	Homo sapiens	human gut	not provided	GCF_902386525.1	2019-08-15	Scaffold	2009507	2009494	Strict	catII from Escherichia coli K-12		protein homolog model	chloramphenicol acetyltransferase (CAT)	phenicol antibiotic	antibiotic inactivation	100	36.62
															Strict	poxtA		protein homolog model	ABC-F ATP-binding cassette ribosomal protection protein	macrolide antibiotic, lincosamide antibiotic, streptogramin antibiotic, tetracycline antibiotic, oxazolidinone antibiotic, phenicol antibiotic, pleuromutilin antibiotic	antibiotic target protection	100	79.52
218	MGYG-HGUT-01517	Lactobacillus amylolyticus (firmicutes)	MGYG-HGUT-01517	PRJEB33885	SAMEA5851020	missing	Homo sapiens	human gut	not provided	GCF_902375705.1	2019-08-22	Contig	1537388	1537388	Strict	Trimethoprim-resistant dihydrofolate reductase DfrA42		protein homolog model	trimethoprim resistant dihydrofolate reductase dfr	diaminopyrimidine antibiotic	antibiotic target replacement	30.14	94.35
219	MGYG-HGUT-00161	Lactobacillus amylovorus (firmicutes)	MGYG-HGUT-00161	PRJEB33885	SAMEA5849662	missing	Homo sapiens	human gut	China	GCF_902363955.1	2019-08-22	Scaffold	2049854	2049624	Strict	Trimethoprim-resistant dihydrofolate reductase DfrA42		protein homolog model	trimethoprim resistant dihydrofolate reductase dfr	diaminopyrimidine antibiotic	antibiotic target replacement	27.21	94.92
															Strict	tet(W/N/W)		protein homolog model	tetracycline-resistant ribosomal protection protein	tetracycline antibiotic	antibiotic target protection	94.51	100.63
220	MGYG-HGUT-00097	Lactobacillus animalis (firmicutes)	MGYG-HGUT-00097	PRJEB33885	SAMEA5849598	missing	Homo sapiens	human gut	not provided	GCF_902363175.1	2019-08-22	Contig	1849821	1849821	Perfect	lnuG		protein homolog model	lincosamide nucleotidyltransferase (LNU)	lincosamide antibiotic	antibiotic inactivation	100	100
															Strict	Trimethoprim-resistant dihydrofolate reductase DfrA42		protein homolog model	trimethoprim resistant dihydrofolate reductase dfr	diaminopyrimidine antibiotic	antibiotic target replacement	28.23	93.79
															Strict	tetM		protein homolog model	tetracycline-resistant ribosomal protection protein	tetracycline antibiotic	antibiotic target protection	98.75
221	MGYG-HGUT-01516	Lactobacillus antri (firmicutes)	MGYG-HGUT-01516	PRJEB33885	SAMEA5851019	missing	Homo sapiens	human gut	not provided	GCF_902375735.1	2019-08-22	Contig	2241837	2241837
222	UHGG_MGYG-HGUT-02380	Lactobacillus brevis (firmicutes)	MGYG-HGUT-02380	PRJEB33885	SAMEA5851884	missing	Homo sapiens	human gut	Russia	GCF_902386565.1	2019-08-16	Contig	2621559	2621559	Strict	cmlA8		protein homolog model	major facilitator superfamily (MFS) antibiotic efflux pump	phenicol antibiotic	antibiotic efflux	100	17.9
223	UHGG_MGYG-HGUT-02348	Lactobacillus crispatus (firmicutes)	MGYG-HGUT-02348	PRJEB33885	SAMEA5851852	missing	Homo sapiens	human gut	Ireland	GCF_902386155.1	2019-08-14	Contig	1829425	1829425	Strict	Trimethoprim-resistant dihydrofolate reductase DfrA42		protein homolog model	trimethoprim resistant dihydrofolate reductase dfr	diaminopyrimidine antibiotic	antibiotic target replacement	26.83	95.48
															Strict	ErmY		protein homolog model	Erm 23S ribosomal RNA methyltransferase	macrolide antibiotic, lincosamide antibiotic, streptogramin antibiotic	antibiotic target alteration	100	19.26
															Strict	poxtA		protein homolog model	ABC-F ATP-binding cassette ribosomal protection protein	macrolide antibiotic, lincosamide antibiotic, streptogramin antibiotic, tetracycline antibiotic, oxazolidinone antibiotic, phenicol antibiotic, pleuromutilin antibiotic	antibiotic target protection	100	80.26
224	MGYG-HGUT-00020	Lactobacillus curvatus (firmicutes)	MGYG-HGUT-00020	PRJEB33885	SAMEA5849521	missing	Homo sapiens	human gut	United Kingdom	GCF_902362325.1	2019-08-22	Scaffold	1925070	1923678	Strict	Trimethoprim-resistant dihydrofolate reductase DfrA42		protein homolog model	trimethoprim resistant dihydrofolate reductase dfr	diaminopyrimidine antibiotic	antibiotic target replacement	30.41	92.66
															Strict	patB		protein homolog model	ATP-binding cassette (ABC) antibiotic efflux pump	fluoroquinolone antibiotic	antibiotic efflux	100	49.49
225	MGYG-HGUT-01369	Lactobacillus delbrueckii (firmicutes)	MGYG-HGUT-01369	PRJEB33885	SAMEA5850872	missing	Homo sapiens	human gut	not provided	GCF_902374335.1	2019-08-22	Scaffold	2071079	1875738	Strict	poxtA		protein homolog model	ABC-F ATP-binding cassette ribosomal protection protein	macrolide antibiotic, lincosamide antibiotic, streptogramin antibiotic, tetracycline antibiotic, oxazolidinone antibiotic, phenicol antibiotic, pleuromutilin antibiotic	antibiotic target protection	100	78.04
															Strict	Trimethoprim-resistant dihydrofolate reductase DfrA42		protein homolog model	trimethoprim resistant dihydrofolate reductase dfr	diaminopyrimidine antibiotic	antibiotic target replacement	27.34	91.53
226	UHGG_MGYG-HGUT-02387	Lactobacillus gasseri (firmicutes)	MGYG-HGUT-02387	PRJEB33885	SAMEA5851891	missing	Homo sapiens	human gut	not provided	GCF_902386655.1	2019-08-10	Complete Genome	2129370	2129370	Strict	Trimethoprim-resistant dihydrofolate reductase DfrA42		protein homolog model	trimethoprim resistant dihydrofolate reductase dfr	diaminopyrimidine antibiotic	antibiotic target replacement	26.92	95.48
															Strict	poxtA		protein homolog model	ABC-F ATP-binding cassette ribosomal protection protein	macrolide antibiotic, lincosamide antibiotic, streptogramin antibiotic, tetracycline antibiotic, oxazolidinone antibiotic, phenicol antibiotic, pleuromutilin antibiotic	antibiotic target protection	100	81.73
227	UHGG_MGYG-HGUT-03690	Lactobacillus gasseri (firmicutes)	MGYG-HGUT-03690	PRJEB33885	SAMEA5853196	missing	Homo sapiens	human gut	China	GCF_902399865.1	2019-08-15	Scaffold	1974590	1974540	Strict	Trimethoprim-resistant dihydrofolate reductase DfrA42		protein homolog model	trimethoprim resistant dihydrofolate reductase dfr	diaminopyrimidine antibiotic	antibiotic target replacement	28.12	95.48
															Strict	poxtA		protein homolog model	ABC-F ATP-binding cassette ribosomal protection protein	macrolide antibiotic, lincosamide antibiotic, streptogramin antibiotic, tetracycline antibiotic, oxazolidinone antibiotic, phenicol antibiotic, pleuromutilin antibiotic	antibiotic target protection	100	82.84
228	UHGG_MGYG-HGUT-02384	Lactobacillus helveticus (firmicutes)	MGYG-HGUT-02384	PRJEB33885	SAMEA5851888	missing	Homo sapiens	human gut	Russia	GCF_902386585.1	2019-08-10	Complete Genome	2058319	2058319	Strict	tva(A)		protein homolog model	ABC-F ATP-binding cassette ribosomal protection protein	macrolide antibiotic, lincosamide antibiotic, streptogramin antibiotic, tetracycline antibiotic, oxazolidinone antibiotic, phenicol antibiotic, pleuromutilin antibiotic	antibiotic target protection	100	8.71
															Strict	Trimethoprim-resistant dihydrofolate reductase DfrA42		protein homolog model	trimethoprim resistant dihydrofolate reductase dfr	diaminopyrimidine antibiotic	antibiotic target replacement	27.94	97.18
															Strict	poxtA		protein homolog model	ABC-F ATP-binding cassette ribosomal protection protein	macrolide antibiotic, lincosamide antibiotic, streptogramin antibiotic, tetracycline antibiotic, oxazolidinone antibiotic, phenicol antibiotic, pleuromutilin antibiotic	antibiotic target protection	100	79.34
229	MGYG-HGUT-01333	Lactobacillus hilgardii (firmicutes)	MGYG-HGUT-01333	PRJEB33885	SAMEA5850836	missing	Homo sapiens	human gut	not provided	GCF_902374015.1	2019-08-16	Scaffold	3144656	3077715	Strict	tet(C)		protein homolog model	major facilitator superfamily (MFS) antibiotic efflux pump	tetracycline antibiotic	antibiotic efflux	100	19.7
															Strict	Trimethoprim-resistant dihydrofolate reductase DfrA42		protein homolog model	trimethoprim resistant dihydrofolate reductase dfr	diaminopyrimidine antibiotic	antibiotic target replacement	29.03	91.53
230	UHGG_MGYG-HGUT-02360	Lactobacillus hominis (firmicutes)	MGYG-HGUT-02360	PRJEB33885	SAMEA5851864	missing	Homo sapiens	human gut	not provided	GCF_902386305.1	2019-08-15	Scaffold	1926334	1926186	Strict	Trimethoprim-resistant dihydrofolate reductase DfrA42		protein homolog model	trimethoprim resistant dihydrofolate reductase dfr	diaminopyrimidine antibiotic	antibiotic target replacement	27.82	94.35
															Strict	poxtA		protein homolog model	ABC-F ATP-binding cassette ribosomal protection protein	macrolide antibiotic, lincosamide antibiotic, streptogramin antibiotic, tetracycline antibiotic, oxazolidinone antibiotic, phenicol antibiotic, pleuromutilin antibiotic	antibiotic target protection	100	86.16
231	MGYG-HGUT-01383	Lactobacillus iners (firmicutes)	MGYG-HGUT-01383	PRJEB33885	SAMEA5850886	missing	Homo sapiens	human gut	not provided	GCF_902374445.1	2019-08-22	Scaffold	1274722	1269131
232	MGYG-HGUT-00008	Lactobacillus johnsonii (firmicutes)	MGYG-HGUT-00008	PRJEB33885	SAMEA5849509	missing	Homo sapiens	human gut	United Kingdom	GCF_902362355.1	2019-08-22	Scaffold	1972012	1971706	Strict	poxtA		protein homolog model	ABC-F ATP-binding cassette ribosomal protection protein	macrolide antibiotic, lincosamide antibiotic, streptogramin antibiotic, tetracycline antibiotic, oxazolidinone antibiotic, phenicol antibiotic, pleuromutilin antibiotic	antibiotic target protection	100	81
															Strict	Trimethoprim-resistant dihydrofolate reductase DfrA42		protein homolog model	trimethoprim resistant dihydrofolate reductase dfr	diaminopyrimidine antibiotic	antibiotic target replacement	28.12	94.35
233	UHGG_MGYG-HGUT-02472	Lactobacillus kefiri (firmicutes)	MGYG-HGUT-02472	PRJEB33885	SAMEA5851977	missing	Homo sapiens	human gut	Italy	GCF_902387495.1	2019-08-16	Scaffold	2570721	2568072	Strict	mdtB		protein homolog model	resistance-nodulation-cell division (RND) antibiotic efflux pump	aminocoumarin antibiotic	antibiotic efflux	100	2.4
234	UHGG_MGYG-HGUT-02319	Lactobacillus mucosae (firmicutes)	MGYG-HGUT-02319	PRJEB33885	SAMEA5851823	missing	Homo sapiens	human gut	not provided	GCF_902385785.1	2019-08-15	Contig	2369669	2369669	Strict	Trimethoprim-resistant dihydrofolate reductase DfrA42		protein homolog model	trimethoprim resistant dihydrofolate reductase dfr	diaminopyrimidine antibiotic	antibiotic target replacement	25.6	92.66
235	UHGG_MGYG-HGUT-02313	Lactobacillus mulieris (firmicutes)	MGYG-HGUT-02313	PRJEB33885	SAMEA5851817	missing	Homo sapiens	human gut	Japan	GCF_902385715.1	2019-08-14	Contig	1675234	1675234	Strict	poxtA		protein homolog model	ABC-F ATP-binding cassette ribosomal protection protein	macrolide antibiotic, lincosamide antibiotic, streptogramin antibiotic, tetracycline antibiotic, oxazolidinone antibiotic, phenicol antibiotic, pleuromutilin antibiotic	antibiotic target protection	100	80.07
236	MGYG-HGUT-00009	Lactobacillus murinus (firmicutes)	MGYG-HGUT-00009	PRJEB33885	SAMEA5849510	missing	Homo sapiens	human gut	United Kingdom	GCF_902362225.1	2019-08-22	Scaffold	2221226	2219797	Strict	Trimethoprim-resistant dihydrofolate reductase DfrA42		protein homolog model	trimethoprim resistant dihydrofolate reductase dfr	diaminopyrimidine antibiotic	antibiotic target replacement	29.03	93.79
237	UHGG_MGYG-HGUT-02542	Lactobacillus parafarraginis (firmicutes)	MGYG-HGUT-02542	PRJEB33885	SAMEA5852047	missing	Homo sapiens	human gut	not provided	GCF_902388245.1	2019-08-16	Contig	2852137	2852137	Strict	Trimethoprim-resistant dihydrofolate reductase DfrA42		protein homolog model	trimethoprim resistant dihydrofolate reductase dfr	diaminopyrimidine antibiotic	antibiotic target replacement	31.62	90.96
238	UHGG_MGYG-HGUT-01293	Lactobacillus rhamnosus (firmicutes)	MGYG-HGUT-01293	PRJEB33885	SAMEA5850796	missing	Homo sapiens	human gut	not provided	GCF_902381635.1	2019-08-10	Complete Genome	3010111	3010111	Strict	lmrB		protein homolog model	ATP-binding cassette (ABC) antibiotic efflux pump	lincosamide antibiotic	antibiotic efflux	100	12.79
239	MGYG-HGUT-01334	Lactobacillus ruminis (firmicutes)	MGYG-HGUT-01334	PRJEB33885	SAMEA5850837	missing	Homo sapiens	human gut	not provided	GCF_902374165.1	2019-08-22	Scaffold	2108740	2103640	Strict	Trimethoprim-resistant dihydrofolate reductase DfrA42		protein homolog model	trimethoprim resistant dihydrofolate reductase dfr	diaminopyrimidine antibiotic	antibiotic target replacement	25.81	94.35
															Strict	Trimethoprim-resistant dihydrofolate reductase DfrA42		protein homolog model	trimethoprim resistant dihydrofolate reductase dfr	diaminopyrimidine antibiotic	antibiotic target replacement	25.44	119.77
240	UHGG_MGYG-HGUT-02389	Lactobacillus sakei (firmicutes)	MGYG-HGUT-02389	PRJEB33885	SAMEA5851893	missing	Homo sapiens	human gut	not provided	GCF_902386625.1	2019-08-15	Contig	1957804	1957804	Strict	patB		protein homolog model	ATP-binding cassette (ABC) antibiotic efflux pump	fluoroquinolone antibiotic	antibiotic efflux	100	7.99
															Strict	Trimethoprim-resistant dihydrofolate reductase DfrA42		protein homolog model	trimethoprim resistant dihydrofolate reductase dfr	diaminopyrimidine antibiotic	antibiotic target replacement	27.74	93.79
															Strict	fexA		protein homolog model	major facilitator superfamily (MFS) antibiotic efflux pump	phenicol antibiotic	antibiotic efflux	100	50.11
															Strict	Tet(X1)		protein homolog model	tetracycline inactivation enzyme	tetracycline antibiotic	antibiotic inactivation	100	17.55
241	UHGG_MGYG-HGUT-02339	Lactobacillus saniviri (firmicutes)	MGYG-HGUT-02339	PRJEB33885	SAMEA5851843	missing	Homo sapiens	human gut	not provided	GCF_902386015.1	2019-08-16	Scaffold	2435824	2435519	Strict	Trimethoprim-resistant dihydrofolate reductase DfrA42		protein homolog model	trimethoprim resistant dihydrofolate reductase dfr	diaminopyrimidine antibiotic	antibiotic target replacement	25	100
242	UHGG_MGYG-HGUT-02361	Lactobacillus senioris (firmicutes)	MGYG-HGUT-02361	PRJEB33885	SAMEA5851865	missing	Homo sapiens	human gut	Japan	GCF_902386285.1	2019-08-14	Scaffold	1566789	1566713	Strict	Trimethoprim-resistant dihydrofolate reductase DfrA42		protein homolog model	trimethoprim resistant dihydrofolate reductase dfr	diaminopyrimidine antibiotic	antibiotic target replacement	29.84	93.79
243	MGYG-HGUT-01335	Lactobacillus ultunensis (firmicutes)	MGYG-HGUT-01335	PRJEB33885	SAMEA5850838	missing	Homo sapiens	human gut	not provided	GCF_902374155.1	2019-08-22	Scaffold	2248406	2168059	Strict	poxtA		protein homolog model	ABC-F ATP-binding cassette ribosomal protection protein	macrolide antibiotic, lincosamide antibiotic, streptogramin antibiotic, tetracycline antibiotic, oxazolidinone antibiotic, phenicol antibiotic, pleuromutilin antibiotic	antibiotic target protection	100	79.34
															Strict	Trimethoprim-resistant dihydrofolate reductase DfrA42		protein homolog model	trimethoprim resistant dihydrofolate reductase dfr	diaminopyrimidine antibiotic	antibiotic target replacement	26.15	94.92
244	UHGG_MGYG-HGUT-02383	Lactobacillus zeae (firmicutes)	MGYG-HGUT-02383	PRJEB33885	SAMEA5851887	missing	Homo sapiens	human gut	Italy	GCF_902386575.1	2019-08-16	Contig	3001027	3001027	Strict	Trimethoprim-resistant dihydrofolate reductase DfrA42		protein homolog model	trimethoprim resistant dihydrofolate reductase dfr	diaminopyrimidine antibiotic	antibiotic target replacement	28.1	92.09
245	UHGG_MGYG-HGUT-02390	Ligilactobacillus agilis (firmicutes)	MGYG-HGUT-02390	PRJEB33885	SAMEA5851894	missing	Homo sapiens	human gut	not provided	GCF_902386685.1	2019-08-15	Scaffold	2134779	2133538	Strict	Trimethoprim-resistant dihydrofolate reductase DfrA42		protein homolog model	trimethoprim resistant dihydrofolate reductase dfr	diaminopyrimidine antibiotic	antibiotic target replacement	26.49	404.52
															Strict	Trimethoprim-resistant dihydrofolate reductase DfrA42		protein homolog model	trimethoprim resistant dihydrofolate reductase dfr	diaminopyrimidine antibiotic	antibiotic target replacement	25.78	95.48
246	UHGG_MGYG-HGUT-02324	Ligilactobacillus salivarius (firmicutes)	MGYG-HGUT-02324	PRJEB33885	SAMEA5851828	missing	Homo sapiens	human gut	China	GCF_902385835.1	2019-08-15	Contig	1978364	1978364	Strict	myrA		protein homolog model	non-erm 23S ribosomal RNA methyltransferase (G748)	macrolide antibiotic, lincosamide antibiotic	antibiotic target alteration	100	18.31
247	MGYG-HGUT-00166	Limosilactobacillus fermentum (firmicutes)	MGYG-HGUT-00166	PRJEB33885	SAMEA5849667	missing	Homo sapiens	human gut	China	GCF_902363965.1	2019-08-22	Scaffold	1968193	1967637
248	UHGG_MGYG-HGUT-02593	uncultured Lactobacillus sp. (firmicutes)	MGYG-HGUT-02593	PRJEB33885	SAMEA5852098	missing	Homo sapiens	human gut	China	n/a	2019-08-14	Contig	1475799	1475799	Strict	poxtA		protein homolog model	ABC-F ATP-binding cassette ribosomal protection protein	macrolide antibiotic, lincosamide antibiotic, streptogramin antibiotic, tetracycline antibiotic, oxazolidinone antibiotic, phenicol antibiotic, pleuromutilin antibiotic	antibiotic target protection	100	86.9
249	UHGG_MGYG-HGUT-04287	uncultured Lactobacillus sp. (firmicutes)	MGYG-HGUT-04287	PRJEB33885	SAMEA5853794	missing	Homo sapiens	human gut	China	n/a	2019-08-15	Contig	2159846	2159846
250	ASM379525v1	Lacticaseibacillus paracasei (firmicutes)	JS1	PRJNA473310	SAMN09270688	2017	Homo sapiens	stool	South Korea	GCF_003795255.1	2018-11-19	Contig	3016870	3016870	Strict	poxtA		protein homolog model	ABC-F ATP-binding cassette ribosomal protection protein	macrolide antibiotic, lincosamide antibiotic, streptogramin antibiotic, tetracycline antibiotic, oxazolidinone antibiotic, phenicol antibiotic, pleuromutilin antibiotic	antibiotic target protection	100	61.07
251	ASM395743v1	Lactobacillus paracasei subsp. tolerans (firmicutes)	AO356	PRJNA422956	SAMN08200884	2016_10_13	*	Korean adult feces	South Korea: Seoul	GCF_003957435.1	2018-12-20	Complete Genome	3096558	3096558	Strict	poxtA		protein homolog model	ABC-F ATP-binding cassette ribosomal protection protein	macrolide antibiotic, lincosamide antibiotic, streptogramin antibiotic, tetracycline antibiotic, oxazolidinone antibiotic, phenicol antibiotic, pleuromutilin antibiotic	antibiotic target protection	100	61.07
															Strict	APH(2'')-Ie		protein homolog model	APH(2'')	aminoglycoside antibiotic	antibiotic inactivation	100	24.92
252	ASM1342573v1	Lactobacillus rhamnosus (firmicutes)	AMC0721	PRJNA645702	SAMN15514049	2016/2018	Homo sapiens	Mucosal surface Ileum	missing	GCF_013425735.1	2020-07-19	Scaffold	3082213	3081869	Strict	lmrB		protein homolog model	ATP-binding cassette (ABC) antibiotic efflux pump	lincosamide antibiotic	antibiotic efflux	100	12.79
															Strict	BJP-1		protein homolog model	BJP beta-lactamase	carbapenem	antibiotic inactivation	100	31.29
253	ASM1342572v1	Lactobacillus rhamnosus (firmicutes)	AMC0712	PRJNA645702	SAMN15514048	2016/2018	Homo sapiens	Mucosal surface Descending Colon	missing	GCF_013425725.1	2020-07-19	Scaffold	2924519	2923896	Strict	BJP-1		protein homolog model	BJP beta-lactamase	carbapenem	antibiotic inactivation	100	31.29
															Strict	lmrB		protein homolog model	ATP-binding cassette (ABC) antibiotic efflux pump	lincosamide antibiotic	antibiotic efflux	100	12.79
254	ASM1342577v1	Lactobacillus rhamnosus (firmicutes)	AMC0706	PRJNA645702	SAMN15514047	2016/2018	Homo sapiens	Mucosal surface Ascending Colon	missing	GCF_013425775.1	2020-07-19	Scaffold	2923917	2923249	Strict	BJP-1		protein homolog model	BJP beta-lactamase	carbapenem	antibiotic inactivation	100	31.29
															Strict	lmrB		protein homolog model	ATP-binding cassette (ABC) antibiotic efflux pump	lincosamide antibiotic	antibiotic efflux	100	12.79
255	ASM1342566v1	Lactobacillus rhamnosus (firmicutes)	AMC0722	PRJNA645702	SAMN15514050	2016/2018	Homo sapiens	Lumen Ileum	missing	GCF_013425665.1	2020-07-19	Scaffold	3082039	3081450	Strict	BJP-1		protein homolog model	BJP beta-lactamase	carbapenem	antibiotic inactivation	100	31.29
															Strict	lmrB		protein homolog model	ATP-binding cassette (ABC) antibiotic efflux pump	lincosamide antibiotic	antibiotic efflux	100	12.79
256	ASM1342565v1	Lactobacillus rhamnosus (firmicutes)	AMC0714	PRJNA645702	SAMN15514051	2016/2018	Homo sapiens	Mucosal surface Transverse Colon	missing	GCF_013425655.1	2020-07-19	Scaffold	3054756	3054395	Strict	BJP-1		protein homolog model	BJP beta-lactamase	carbapenem	antibiotic inactivation	100	31.29
															Strict	lmrB		protein homolog model	ATP-binding cassette (ABC) antibiotic efflux pump	lincosamide antibiotic	antibiotic efflux	100	12.79
257	ASM1342564v1	Lactobacillus rhamnosus (firmicutes)	AMC0716	PRJNA645702	SAMN15514052	2016/2018	Homo sapiens	Mucosal surface Transverse Colon	missing	GCF_013425645.1	2020-07-19	Scaffold	3055270	3054923	Strict	lmrB		protein homolog model	ATP-binding cassette (ABC) antibiotic efflux pump	lincosamide antibiotic	antibiotic efflux	100	12.79
															Strict	BJP-1		protein homolog model	BJP beta-lactamase	carbapenem	antibiotic inactivation	100	31.29
258	ASM1342561v1	Lactobacillus rhamnosus (firmicutes)	AMC0710	PRJNA645702	SAMN15514054	2016/2018	Homo sapiens	Lumen Descending Colon	missing	GCF_013425615.1	2020-07-20	Scaffold	3057044	3056580	Strict	lmrB		protein homolog model	ATP-binding cassette (ABC) antibiotic efflux pump	lincosamide antibiotic	antibiotic efflux	100	12.79
															Strict	BJP-1		protein homolog model	BJP beta-lactamase	carbapenem	antibiotic inactivation	100	31.29
259	ASM1342560v1	Lactobacillus rhamnosus (firmicutes)	AMC0720	PRJNA645702	SAMN15514053	2016/2018	Homo sapiens	Lumen Ileum	missing	GCF_013425605.1	2020-07-19	Contig	3067433	3067433	Strict	lmrB		protein homolog model	ATP-binding cassette (ABC) antibiotic efflux pump	lincosamide antibiotic	antibiotic efflux	100	12.79
															Strict	BJP-1		protein homolog model	BJP beta-lactamase	carbapenem	antibiotic inactivation	100	31.29
260	ASM1342554v1	Lactobacillus rhamnosus (firmicutes)	AMC0709	PRJNA645702	SAMN15514057	2016/2018	Homo sapiens	Mucosal surface Ascending Colon	missing	GCF_013425545.1	2020-07-19	Scaffold	3081148	3080787	Strict	lmrB		protein homolog model	ATP-binding cassette (ABC) antibiotic efflux pump	lincosamide antibiotic	antibiotic efflux	100	12.79
															Strict	BJP-1		protein homolog model	BJP beta-lactamase	carbapenem	antibiotic inactivation	100	31.29
261	ASM1342555v1	Lactobacillus rhamnosus (firmicutes)	AMC0713	PRJNA645702	SAMN15514055	2016/2018	Homo sapiens	Lumen Transverse Colon	missing	GCF_013425555.1	2020-07-19	Scaffold	3084973	3084610	Strict	lmrB		protein homolog model	ATP-binding cassette (ABC) antibiotic efflux pump	lincosamide antibiotic	antibiotic efflux	100	12.79
															Strict	BJP-1		protein homolog model	BJP beta-lactamase	carbapenem	antibiotic inactivation	100	31.29
262	ASM1342556v1	Lactobacillus rhamnosus (firmicutes)	AMC0707	PRJNA645702	SAMN15514056	2016/2018	Homo sapiens	Mucosal surface Ascending Colon	missing	GCF_013425565.1	2020-07-19	Scaffold	3062980	3062634	Strict	BJP-1		protein homolog model	BJP beta-lactamase	carbapenem	antibiotic inactivation	100	31.29
															Strict	lmrB		protein homolog model	ATP-binding cassette (ABC) antibiotic efflux pump	lincosamide antibiotic	antibiotic efflux	100	12.79
263	ASM15917v1	Lactobacillus brevis subsp. gravesensis ATCC 27305 (firmicutes)	ATCC 27305	PRJNA31481	SAMN00001468	not determined	Homo sapiens	biological product	not determined	GCF_000159175.1	2009-05-28	Scaffold	3144656	3077715	Strict	tet(C)		protein homolog model	major facilitator superfamily (MFS) antibiotic efflux pump	tetracycline antibiotic	antibiotic efflux	100	19.7
															Strict	Trimethoprim-resistant dihydrofolate reductase DfrA42		protein homolog model	trimethoprim resistant dihydrofolate reductase dfr	diaminopyrimidine antibiotic	antibiotic target replacement	29.03	91.53
264	ASM1171465v1	Lactobacillus jensenii (firmicutes)	M167	PRJNA498340	SAMN10290265	2017_11_02	Homo sapiens	fetal intestine	USA: San Francisco	GCF_011714655.1	2020-03-24	Contig	1634111	1634111	Strict	poxtA		protein homolog model	ABC-F ATP-binding cassette ribosomal protection protein	macrolide antibiotic, lincosamide antibiotic, streptogramin antibiotic, tetracycline antibiotic, oxazolidinone antibiotic, phenicol antibiotic, pleuromutilin antibiotic	antibiotic target protection	100	80.63
265	ASM1171462v1	Lactobacillus jensenii (firmicutes)	M166	PRJNA498338	SAMN10290246	2017_11_01	Homo sapiens	fetal intestine	USA: San Francisco	GCF_011714625.1	2020-03-24	Contig	1669518	1669518	Strict	poxtA		protein homolog model	ABC-F ATP-binding cassette ribosomal protection protein	macrolide antibiotic, lincosamide antibiotic, streptogramin antibiotic, tetracycline antibiotic, oxazolidinone antibiotic, phenicol antibiotic, pleuromutilin antibiotic	antibiotic target protection	100	80.63
266	ASM872783v1	Lactobacillus rhamnosus (firmicutes)	hsryfm 1301	PRJNA572562	SAMN12793868	2013_07_13	Homo sapiens	intestinal tract	China	GCF_008727835.1	2019-09-29	Complete Genome	3067813	3067813	Strict	BJP-1		protein homolog model	BJP beta-lactamase	carbapenem	antibiotic inactivation	100	31.29
															Strict	lmrB		protein homolog model	ATP-binding cassette (ABC) antibiotic efflux pump	lincosamide antibiotic	antibiotic efflux	100	12.79
267	ASM46936v1	Lactobacillus brevis ATCC 14869 = DSM 20054 (firmicutes)	ATCC 14869	PRJNA38325	SAMN02436750	missing	Homo sapiens	gastrointestinal tract	missing	GCF_000469365.1	2013-09-20	Scaffold	2473047	2467747	Strict	APH(3')-VIIa		protein homolog model	APH(3')	aminoglycoside antibiotic	antibiotic inactivation	100	20.4
268	ASM15551v2	Lactobacillus paracasei subsp. paracasei 8700:2 (firmicutes)	8700:2	PRJNA30077	SAMN02463682	not determined	Homo sapiens	biological product	not determined	GCF_000155515.2	2013-08-21	Complete Genome	3025352	3025352	Strict	poxtA		protein homolog model	ABC-F ATP-binding cassette ribosomal protection protein	macrolide antibiotic, lincosamide antibiotic, streptogramin antibiotic, tetracycline antibiotic, oxazolidinone antibiotic, phenicol antibiotic, pleuromutilin antibiotic	antibiotic target protection	100	61.07
269	ASM143461v1	Lactobacillus reuteri DSM 20016 (firmicutes)	DSM 20016	PRJNA222257	SAMN02369412	1982	missing	intestine of adult	missing	GCF_001434615.1	2015-11-06	Scaffold	1935860	1935699	Strict	Trimethoprim-resistant dihydrofolate reductase DfrA42		protein homolog model	trimethoprim resistant dihydrofolate reductase dfr	diaminopyrimidine antibiotic	antibiotic target replacement	26.77	91.53
270	ASM143612v1	Lactobacillus hominis DSM 23910 = CRBIP 24.179 (firmicutes)	DSM 23910	PRJNA222257	SAMN02369400	2013	Homo sapiens	intestine	France	GCF_001436125.1	2015-11-06	Scaffold	1926334	1926186	Strict	Trimethoprim-resistant dihydrofolate reductase DfrA42		protein homolog model	trimethoprim resistant dihydrofolate reductase dfr	diaminopyrimidine antibiotic	antibiotic target replacement	27.82	94.35
															Strict	poxtA		protein homolog model	ABC-F ATP-binding cassette ribosomal protection protein	macrolide antibiotic, lincosamide antibiotic, streptogramin antibiotic, tetracycline antibiotic, oxazolidinone antibiotic, phenicol antibiotic, pleuromutilin antibiotic	antibiotic target protection	100	86.16
271	ASM15941v1	Lactobacillus ultunensis DSM 16047 (firmicutes)	DSM 16047	PRJNA31505	SAMN00001484	not determined	Homo sapiens	biological product	not determined	GCF_000159415.1	2009-06-26	Scaffold	2248406	2168059	Strict	poxtA		protein homolog model	ABC-F ATP-binding cassette ribosomal protection protein	macrolide antibiotic, lincosamide antibiotic, streptogramin antibiotic, tetracycline antibiotic, oxazolidinone antibiotic, phenicol antibiotic, pleuromutilin antibiotic	antibiotic target protection	100	79.34
															Strict	Trimethoprim-resistant dihydrofolate reductase DfrA42		protein homolog model	trimethoprim resistant dihydrofolate reductase dfr	diaminopyrimidine antibiotic	antibiotic target replacement	26.15	94.92
272	ASM14374v1	Lactobacillus plantarum subsp. plantarum ATCC 14917 = JCM 1149 = CGMCC 1.2437	ATCC 14917	PRJNA31515	SAMN00001478	not determined	Homo sapiens	biological product	not determined	GCF_000143745.1	2010-07-22	Scaffold	3212261	3198761	Strict	Trimethoprim-resistant dihydrofolate reductase DfrA42		protein homolog model	trimethoprim resistant dihydrofolate reductase dfr	diaminopyrimidine antibiotic	antibiotic target replacement	28.86	92.09
273	ASM16083v1	Lactobacillus antri DSM 16041 (firmicutes)	DSM 16041	PRJNA31479	SAMN00001477	not determined	Homo sapiens	biological product	not determined	GCF_000160835.1	2009-09-22	Scaffold	2302896	2242444
274	ASM15921v1	Lactobacillus fermentum ATCC 14931 (firmicutes)	ATCC 14931	PRJNA31485	SAMN00001473	not determined	Homo sapiens	biological product	not determined	GCF_000159215.1	2009-05-28	Scaffold	1867005	1796949	Strict	tet(C)		protein homolog model	major facilitator superfamily (MFS) antibiotic efflux pump	tetracycline antibiotic	antibiotic efflux	100	17.68
															Strict	baeS		protein homolog model	resistance-nodulation-cell division (RND) antibiotic efflux pump	aminoglycoside antibiotic, aminocoumarin antibiotic	antibiotic efflux	100	16.92
275	ASM15949v1	Lactobacillus paracasei subsp. paracasei ATCC 25302 (firmicutes)	ATCC 25302	PRJNA31513	SAMN00001470	not determined	Homo sapiens	biological product	not determined	GCF_000159495.1	2009-05-28	Scaffold	2991737	2885587	Strict	tet(C)		protein homolog model	major facilitator superfamily (MFS) antibiotic efflux pump	tetracycline antibiotic	antibiotic efflux	100	17.42
															Strict	tet(C)		protein homolog model	major facilitator superfamily (MFS) antibiotic efflux pump	tetracycline antibiotic	antibiotic efflux	100	40.66
															Strict	poxtA		protein homolog model	ABC-F ATP-binding cassette ribosomal protection protein	macrolide antibiotic, lincosamide antibiotic, streptogramin antibiotic, tetracycline antibiotic, oxazolidinone antibiotic, phenicol antibiotic, pleuromutilin antibiotic	antibiotic target protection	100	61.07
276	ASM15931v1	Lactobacillus hilgardii DSM 20176 = ATCC 8290 (firmicutes)	ATCC 8290	PRJNA31489	SAMN00001467	not determined	Homo sapiens	biological product	not determined	GCF_000159315.1	2009-05-28	Scaffold	2721039	2619588	Strict	Trimethoprim-resistant dihydrofolate reductase DfrA42		protein homolog model	trimethoprim resistant dihydrofolate reductase dfr	diaminopyrimidine antibiotic	antibiotic target replacement	29.84	91.53
															Strict	Bifidobacterium bifidum ileS conferring resistance to mupirocin		protein homolog model	antibiotic-resistant isoleucyl-tRNA synthetase (ileS)	mupirocin	antibiotic target alteration	100	2.89
277	ASM401001v1	Lactobacillus johnsonii (firmicutes)	CH32	PRJNA507703	SAMN10502285	2016	Homo sapiens	intestine	South Korea:Seoul	GCF_004010015.1	2019-01-09	Contig	1979358	1979358	Strict	Trimethoprim-resistant dihydrofolate reductase DfrA42		protein homolog model	trimethoprim resistant dihydrofolate reductase dfr	diaminopyrimidine antibiotic	antibiotic target replacement	27.91	94.35
															Strict	poxtA		protein homolog model	ABC-F ATP-binding cassette ribosomal protection protein	macrolide antibiotic, lincosamide antibiotic, streptogramin antibiotic, tetracycline antibiotic, oxazolidinone antibiotic, phenicol antibiotic, pleuromutilin antibiotic	antibiotic target protection	100	81
															Strict	Escherichia coli acrR with mutation conferring multidrug antibiotic resistance		protein overexpression model	resistance-nodulation-cell division (RND) antibiotic efflux pump	fluoroquinolone antibiotic, cephalosporin, glycylcycline, penam, tetracycline antibiotic, rifamycin antibiotic, phenicol antibiotic, triclosan	antibiotic target alteration, antibiotic efflux	100	26.98
278	Lactobacillus_sp_7_1_47FAA_V1	Lactobacillus iners (firmicutes)	7_1_47FAA	PRJNA40031	SAMN02463801	not determined	Homo sapiens	biological product	not determined	GCF_000227195.1	2011-10-04	Scaffold	1274722	1269131
279	ASM207695v1	Lactobacillus rhamnosus (firmicutes)	Pen	PRJNA359638	SAMN06196449	2005	Homo sapiens	gastrointestinal tract	Poland	GCF_002076955.1	2017-04-03	Complete Genome	2884966	2884966	Strict	lmrB		protein homolog model	ATP-binding cassette (ABC) antibiotic efflux pump	lincosamide antibiotic	antibiotic efflux	100	12.79
280	ASM188529v1	Lactobacillus casei (firmicutes)	Z11	PRJNA353570	SAMN06036023	2009	Homo sapiens	adult intestinal biopsy	Denmark: Copenhagen	GCF_001885295.1	2016-11-22	Scaffold	2744915	2744682	Strict	poxtA		protein homolog model	ABC-F ATP-binding cassette ribosomal protection protein	macrolide antibiotic, lincosamide antibiotic, streptogramin antibiotic, tetracycline antibiotic, oxazolidinone antibiotic, phenicol antibiotic, pleuromutilin antibiotic	antibiotic target protection	100	61.07
															Strict	APH(2'')-Ie		protein homolog model	APH(2'')	aminoglycoside antibiotic	antibiotic inactivation	100	24.92
281	ASM170209v1	Lactobacillus helveticus (firmicutes)	D76	PRJNA330602	SAMN05417796	1991	Homo sapiens	intestine from healthy child	Russia: Leningrad	GCF_001702095.1	2016-08-10	Complete Genome	2058319	2058319	Strict	tva(A)		protein homolog model	ABC-F ATP-binding cassette ribosomal protection protein	macrolide antibiotic, lincosamide antibiotic, streptogramin antibiotic, tetracycline antibiotic, oxazolidinone antibiotic, phenicol antibiotic, pleuromutilin antibiotic	antibiotic target protection	100	8.71
															Strict	Trimethoprim-resistant dihydrofolate reductase DfrA42		protein homolog model	trimethoprim resistant dihydrofolate reductase dfr	diaminopyrimidine antibiotic	antibiotic target replacement	27.94	97.18
															Strict	poxtA		protein homolog model	ABC-F ATP-binding cassette ribosomal protection protein	macrolide antibiotic, lincosamide antibiotic, streptogramin antibiotic, tetracycline antibiotic, oxazolidinone antibiotic, phenicol antibiotic, pleuromutilin antibiotic	antibiotic target protection	100	79.34
282	ASM174626v2	Lactobacillus helveticus (firmicutes)	D75	PRJNA330602	SAMN05417795	1991	Homo sapiens	intestine of a healthy child	Russia:Leningrad	GCF_001746265.1	2017-03-13	Complete Genome	2053066	2053066	Strict	tva(A)		protein homolog model	ABC-F ATP-binding cassette ribosomal protection protein	macrolide antibiotic, lincosamide antibiotic, streptogramin antibiotic, tetracycline antibiotic, oxazolidinone antibiotic, phenicol antibiotic, pleuromutilin antibiotic	antibiotic target protection	100	8.71
															Strict	Trimethoprim-resistant dihydrofolate reductase DfrA42		protein homolog model	trimethoprim resistant dihydrofolate reductase dfr	diaminopyrimidine antibiotic	antibiotic target replacement	27.94	97.18
															Strict	poxtA		protein homolog model	ABC-F ATP-binding cassette ribosomal protection protein	macrolide antibiotic, lincosamide antibiotic, streptogramin antibiotic, tetracycline antibiotic, oxazolidinone antibiotic, phenicol antibiotic, pleuromutilin antibiotic	antibiotic target protection	100	79.34
283	ASM165668v1	Lactobacillus rhamnosus (firmicutes)	: Lrh19	PRJNA253894	SAMN03196650	not collected	Homo sapiens	healthy intestine	not collected	GCF_001656685.1	2016-06-03	Contig	2937715	2937715
284	ASM19537v2	Lactobacillus rhamnosus MTCC 5462 (firmicutes)	MTCC 5462	PRJNA62113	SAMN02470978	missing	Homo sapiens	healthy human intestinal cavity	missing	GCF_000195375.1 (suppressed)	2011-04-07	Contig	2524513	2524513	Strict	tet(30)		protein homolog model	major facilitator superfamily (MFS) antibiotic efflux pump	tetracycline antibiotic	antibiotic efflux	100	16.75
															Strict	macA		protein homolog model	ATP-binding cassette (ABC) antibiotic efflux pump	macrolide antibiotic	antibiotic efflux	100	7.91
															Strict	lmrB		protein homolog model	ATP-binding cassette (ABC) antibiotic efflux pump	lincosamide antibiotic	antibiotic efflux	100	12.79
															Strict	nalD		protein overexpression model	resistance-nodulation-cell division (RND) antibiotic efflux pump	macrolide antibiotic, fluoroquinolone antibiotic, monobactam, carbapenem, cephalosporin, cephamycin, penam, tetracycline antibiotic, peptide antibiotic, aminocoumarin antibiotic, diaminopyrimidine antibiotic, sulfonamide antibiotic, phenicol antibiotic, penem	antibiotic efflux	100	44.34
285	ASM16071v1	Lactobacillus reuteri MM2-3 (firmicutes)	MM2-3	PRJNA34627	SAMN00002242	not determined	Homo sapiens	biological product	not determined	GCF_000160715.1	2009-07-07	Scaffold	2015721	1943466	Strict	msbA		protein homolog model	ATP-binding cassette (ABC) antibiotic efflux pump	nitroimidazole antibiotic	antibiotic efflux	100	13.23
															Strict	eptA		protein homolog model	pmr phosphoethanolamine transferase	peptide antibiotic	antibiotic target alteration	100	14.63
															Strict	tet(C)		protein homolog model	major facilitator superfamily (MFS) antibiotic efflux pump	tetracycline antibiotic	antibiotic efflux	100	11.11
															Strict	tet(C)		protein homolog model	major facilitator superfamily (MFS) antibiotic efflux pump	tetracycline antibiotic	antibiotic efflux	100	72.73
															Strict	Trimethoprim-resistant dihydrofolate reductase DfrA42		protein homolog model	trimethoprim resistant dihydrofolate reductase dfr	diaminopyrimidine antibiotic	antibiotic target replacement	26.77	91.53
286	ASM15947v2	Lactobacillus reuteri MM4-1A (firmicutes)	MM4-1A	PRJNA31511	SAMN00001504	not determined	Homo sapiens	biological product	not determined	GCF_000159475.2	2011-03-01	Contig	2067914	2067914	Strict	Trimethoprim-resistant dihydrofolate reductase DfrA42		protein homolog model	trimethoprim resistant dihydrofolate reductase dfr	diaminopyrimidine antibiotic	antibiotic target replacement	26.77	91.53
287	ASM588607v1	Lactobacillus paragasseri JV-V03 (firmicutes)	JV-V03	PRJNA543187	SAMN00001501	not determined	Homo sapiens	biological product	not determined	GCF_005886075.1	2019-05-29	Complete Genome	2030305	2030305	Strict	poxtA		protein homolog model	ABC-F ATP-binding cassette ribosomal protection protein	macrolide antibiotic, lincosamide antibiotic, streptogramin antibiotic, tetracycline antibiotic, oxazolidinone antibiotic, phenicol antibiotic, pleuromutilin antibiotic	antibiotic target protection	100	82.29
															Strict	Trimethoprim-resistant dihydrofolate reductase DfrA42		protein homolog model	trimethoprim resistant dihydrofolate reductase dfr	diaminopyrimidine antibiotic	antibiotic target replacement	26.92	95.48
288	ASM15937v2	Lactobacillus ruminis ATCC 25644 (firmicutes)	ATCC 25644	PRJNA31499	SAMN00001480	not determined	Homo sapiens	biological product	not determined	GCF_000159375.2	2011-02-16	Scaffold	2108740	2103640	Strict	Trimethoprim-resistant dihydrofolate reductase DfrA42		protein homolog model	trimethoprim resistant dihydrofolate reductase dfr	diaminopyrimidine antibiotic	antibiotic target replacement	25.81	94.35
															Strict	Trimethoprim-resistant dihydrofolate reductase DfrA42		protein homolog model	trimethoprim resistant dihydrofolate reductase dfr	diaminopyrimidine antibiotic	antibiotic target replacement	25.44	119.77
289	ASM16017v1	Lactobacillus rhamnosus LMS2-1 (firmicutes)	LMS2-1	PRJNA31497	SAMN00001479	not determined	Homo sapiens	biological product	not determined	GCF_000160175.1	2009-06-26	Scaffold	3159402	3108760	Strict	mdsC		protein homolog model	resistance-nodulation-cell division (RND) antibiotic efflux pump	monobactam, carbapenem, cephalosporin, cephamycin, penam, phenicol antibiotic, penem	antibiotic efflux	100	5.17
															Strict	lmrB		protein homolog model	ATP-binding cassette (ABC) antibiotic efflux pump	lincosamide antibiotic	antibiotic efflux	100	12.79
290	ASM15971v1	Lactobacillus acidophilus ATCC 4796 (firmicutes)	ATCC 4796	PRJNA31477	SAMN00001471	not determined	Homo sapiens	biological product	not determined	GCF_000159715.1	2009-05-28	Scaffold	2020500	1999667	Strict	tet(C)		protein homolog model	major facilitator superfamily (MFS) antibiotic efflux pump	tetracycline antibiotic	antibiotic efflux	98.77	20.45
															Strict	poxtA		protein homolog model	ABC-F ATP-binding cassette ribosomal protection protein	macrolide antibiotic, lincosamide antibiotic, streptogramin antibiotic, tetracycline antibiotic, oxazolidinone antibiotic, phenicol antibiotic, pleuromutilin antibiotic	antibiotic target protection	100	79.52
291	ASM15919v1	Lactobacillus buchneri ATCC 11577 (firmicutes)	ATCC 11577	PRJNA31483	SAMN00001469	not determined	Homo sapiens	biological product	not determined	GCF_000159195.1 (suppressed)	2009-05-28	Scaffold	2906028	2858741	Strict	tet(C)		protein homolog model	major facilitator superfamily (MFS) antibiotic efflux pump	tetracycline antibiotic	antibiotic efflux	100	16.92
															Strict	tet(C)		protein homolog model	major facilitator superfamily (MFS) antibiotic efflux pump	tetracycline antibiotic	antibiotic efflux	100	19.7
															Strict	Trimethoprim-resistant dihydrofolate reductase DfrA42		protein homolog model	trimethoprim resistant dihydrofolate reductase dfr	diaminopyrimidine antibiotic	antibiotic target replacement	29.03	91.53
															Strict	Bifidobacterium bifidum ileS conferring resistance to mupirocin		protein homolog model	antibiotic-resistant isoleucyl-tRNA synthetase (ileS)	mupirocin	antibiotic target alteration	100	2.89
292	ASM17847v1	Lactobacillus amylolyticus DSM 11664 (firmicutes)	DSM 11664	PRJNA34615	SAMN00262700	not determined	Homo sapiens	biological product	not determined	GCF_000178475.1	2010-04-23	Contig	1540806	1540806	Strict	Trimethoprim-resistant dihydrofolate reductase DfrA42		protein homolog model	trimethoprim resistant dihydrofolate reductase dfr	diaminopyrimidine antibiotic	antibiotic target replacement	30.14	94.35
															Strict	tet(C)		protein homolog model	major facilitator superfamily (MFS) antibiotic efflux pump	tetracycline antibiotic	antibiotic efflux	100	65.91
															Strict	tet(C)		protein homolog model	major facilitator superfamily (MFS) antibiotic efflux pump	tetracycline antibiotic	antibiotic efflux	100	15.66
293	ASM16085v1	Lactobacillus helveticus DSM 20075 = CGMCC 1.1877 (firmicutes)	DSM 20075	PRJNA34619	SAMN00139430	not determined	Homo sapiens	biological product	not determined	GCF_000160855.1	2009-09-22	Scaffold	2020582	1808667	Strict	poxtA		protein homolog model	ABC-F ATP-binding cassette ribosomal protection protein	macrolide antibiotic, lincosamide antibiotic, streptogramin antibiotic, tetracycline antibiotic, oxazolidinone antibiotic, phenicol antibiotic, pleuromutilin antibiotic	antibiotic target protection	100	79.34
															Strict	Trimethoprim-resistant dihydrofolate reductase DfrA42		protein homolog model	trimethoprim resistant dihydrofolate reductase dfr	diaminopyrimidine antibiotic	antibiotic target replacement	27.94	97.18
294	ASM19216v1	Lactobacillus delbrueckii subsp. lactis DSM 20072 (firmicutes)	DSM 20072	PRJNA53001	SAMN00253996	not determined	Homo sapiens	biological product	not determined	GCF_000192165.1	2011-03-16	Scaffold	2071079	1875738	Strict	poxtA		protein homolog model	ABC-F ATP-binding cassette ribosomal protection protein	macrolide antibiotic, lincosamide antibiotic, streptogramin antibiotic, tetracycline antibiotic, oxazolidinone antibiotic, phenicol antibiotic, pleuromutilin antibiotic	antibiotic target protection	100	78.04
															Strict	Trimethoprim-resistant dihydrofolate reductase DfrA42		protein homolog model	trimethoprim resistant dihydrofolate reductase dfr	diaminopyrimidine antibiotic	antibiotic target replacement	27.34	91.53
295	ASM15945v2	Lactobacillus reuteri SD2112 (firmicutes)	SD2112	PRJNA30643	SAMN00001494	not determined	Homo sapiens	biological product	not determined	GCF_000159455.2	2011-06-20	Complete Genome	2316838	2316838	Strict	Trimethoprim-resistant dihydrofolate reductase DfrA42		protein homolog model	trimethoprim resistant dihydrofolate reductase dfr	diaminopyrimidine antibiotic	antibiotic target replacement	25.98	91.53
															Strict	tet(W/N/W)		protein homolog model	tetracycline-resistant ribosomal protection protein	tetracycline antibiotic	antibiotic target protection	94.51	100
															Strict	lnuA		protein homolog model	lincosamide nucleotidyltransferase (LNU)	lincosamide antibiotic	antibiotic inactivation	97.52	100
296	ASM23586v1	Lactobacillus rhamnosus ATCC 21052 (firmicutes)	ATCC 21052	PRJNA65127	SAMN02299451	not determined	Homo sapiens	biological product	not determined	GCF_000235865.1	2011-11-18	Scaffold	2877033	2870765	Strict	lmrB		protein homolog model	ATP-binding cassette (ABC) antibiotic efflux pump	lincosamide antibiotic	antibiotic efflux	100	12.79
297	26009_2#28	Lactobacillus rhamnosus (firmicutes)	4928STDY7387919	PRJEB22252	SAMEA4623334	2018	Homo sapiens	faecal	United Kingdom	GCF_902166035.1	2019-07-11	Scaffold	2951803	2951597	Strict	BJP-1		protein homolog model	BJP beta-lactamase	carbapenem	antibiotic inactivation	100	30.27
															Strict	lmrB		protein homolog model	ATP-binding cassette (ABC) antibiotic efflux pump	lincosamide antibiotic	antibiotic efflux	100	12.79
298	ASM273824v1	Ligilactobacillus salivarius (firmicutes)	SGL 03	PRJNA414381	SAMN07787064	15_Jan_2016	Homo sapiens	stool	Italy	GCF_002738245.1	2017-10-31	Scaffold	1989039	1988949	Strict	tetM		protein homolog model	tetracycline-resistant ribosomal protection protein	tetracycline antibiotic	antibiotic target protection	94.37	100
															Strict	Trimethoprim-resistant dihydrofolate reductase DfrA42		protein homolog model	trimethoprim resistant dihydrofolate reductase dfr	diaminopyrimidine antibiotic	antibiotic target replacement	25.38	94.35
															Strict	myrA		protein homolog model	non-erm 23S ribosomal RNA methyltransferase (G748)	macrolide antibiotic, lincosamide antibiotic	antibiotic target alteration	100	18.31
															Strict	Trimethoprim-resistant dihydrofolate reductase DfrA42		protein homolog model	trimethoprim resistant dihydrofolate reductase dfr	diaminopyrimidine antibiotic	antibiotic target replacement	25	119.77
299	ASM476721v1	Lactobacillus ruminis (firmicutes)	ICIS-540	PRJNA529347	SAMN11265029	03_Mar_2014	Homo sapiens	feces	Russia: Orenburg	GCF_004767215.1	2019-04-09	Contig	2397517	2397517	Perfect	tet(K)		protein homolog model	major facilitator superfamily (MFS) antibiotic efflux pump	tetracycline antibiotic	antibiotic efflux	100	100
															Strict	Trimethoprim-resistant dihydrofolate reductase DfrA42		protein homolog model	trimethoprim resistant dihydrofolate reductase dfr	diaminopyrimidine antibiotic	antibiotic target replacement	25.44	119.77
															Strict	Trimethoprim-resistant dihydrofolate reductase DfrA42		protein homolog model	trimethoprim resistant dihydrofolate reductase dfr	diaminopyrimidine antibiotic	antibiotic target replacement	25.81	94.35
															Strict	Staphylococcus aureus norA		protein homolog model	major facilitator superfamily (MFS) antibiotic efflux pump	fluoroquinolone antibiotic	antibiotic efflux	100	7.47
															Strict	mepR		protein homolog model	multidrug and toxic compound extrusion (MATE) transporter	glycylcycline, tetracycline antibiotic	antibiotic efflux	100	84.89
300	ASM1421239v1	Lactiplantibacillus plantarum (firmicutes)	Q1	PRJNA656396	SAMN15783625	Oct_2019	missing	feces	Finland:Kuopio	GCF_014212395.1	2020-08-16	Contig	3333045	3333045
301	ASM636497v1	Lactiplantibacillus plantarum (firmicutes)	NTTN08	PRJNA546102	SAMN11952115	08_Aug_2016	Homo sapiens	feces	Viet Nam	GCF_006364975.1	2019-06-19	Scaffold	3202912	3202892	Strict	Trimethoprim-resistant dihydrofolate reductase DfrA42		protein homolog model	trimethoprim resistant dihydrofolate reductase dfr	diaminopyrimidine antibiotic	antibiotic target replacement	28.86	92.09
302	ASM198165v1	Lactiplantibacillus plantarum (firmicutes)	RI-190	PRJNA343164	SAMN05717719	missing	Homo sapiens	intestine of an adult	missing	GCF_001981655.1	2017-02-01	Scaffold	3098404	3098392	Strict	Trimethoprim-resistant dihydrofolate reductase DfrA42		protein homolog model	trimethoprim resistant dihydrofolate reductase dfr	diaminopyrimidine antibiotic	antibiotic target replacement	28.86	92.09
303	ASM163374v1	Lactiplantibacillus plantarum (firmicutes)	Nizo3893	PRJNA314113	SAMN04528933	01_Jan_2013	Homo sapiens	stool	France	GCF_001633745.1	2016-04-28	Contig	3342747	3342747	Strict	BKC-1		protein homolog model	BKC Beta-lactamase	carbapenem	antibiotic inactivation	100	11.82
															Strict	BKC-1		protein homolog model	BKC Beta-lactamase	carbapenem	antibiotic inactivation	100	11.82
															Strict	Trimethoprim-resistant dihydrofolate reductase DfrA42		protein homolog model	trimethoprim resistant dihydrofolate reductase dfr	diaminopyrimidine antibiotic	antibiotic target replacement	28.86	92.09
304	ASM163950v1	Lactiplantibacillus plantarum (firmicutes)	Nizo2257	PRJNA313911	SAMN04525445	01_Jan_2013	Homo sapiens	stool	France	GCF_001639505.1	2016-04-28	Contig	3156658	3156658	Strict	Trimethoprim-resistant dihydrofolate reductase DfrA42		protein homolog model	trimethoprim resistant dihydrofolate reductase dfr	diaminopyrimidine antibiotic	antibiotic target replacement	28.86	92.09
305	ASM163380v1	Lactiplantibacillus plantarum (firmicutes)	Nizo2256	PRJNA313909	SAMN04525444	01_Jan_2013	Homo sapiens	stool	France	GCF_001633805.1	2016-04-28	Contig	2997695	2997695	Strict	Trimethoprim-resistant dihydrofolate reductase DfrA42		protein homolog model	trimethoprim resistant dihydrofolate reductase dfr	diaminopyrimidine antibiotic	antibiotic target replacement	28.86	92.09
306	ASM163942v1	Lactiplantibacillus plantarum (firmicutes)	Nizo1838	PRJNA313512	SAMN04524170	01_Jan_2014	Homo sapiens	stool	France	GCF_001639425.1	2016-04-28	Contig	3034081	3034081	Strict	Trimethoprim-resistant dihydrofolate reductase DfrA42		protein homolog model	trimethoprim resistant dihydrofolate reductase dfr	diaminopyrimidine antibiotic	antibiotic target replacement	28.86	92.09
307	ASM95619v1	Lactiplantibacillus plantarum (firmicutes)	CIP104448	PRJNA263714	SAMN03160619	2010	missing	Human stool	France	GCF_000956195.1	2015-03-19	Contig	3237330	3237330	Strict	Trimethoprim-resistant dihydrofolate reductase DfrA42		protein homolog model	trimethoprim resistant dihydrofolate reductase dfr	diaminopyrimidine antibiotic	antibiotic target replacement	28.86	92.09
308	ASM100569v1	Lactiplantibacillus plantarum (firmicutes)	TIFN101	PRJNA263713	SAMN03160585	2010	Homo sapiens	stool	France	GCF_001005695.1	2015-05-08	Contig	3079349	3079349	Strict	Trimethoprim-resistant dihydrofolate reductase DfrA42		protein homolog model	trimethoprim resistant dihydrofolate reductase dfr	diaminopyrimidine antibiotic	antibiotic target replacement	28.86	92.09
															Strict	catI		protein homolog model	chloramphenicol acetyltransferase (CAT)	phenicol antibiotic	antibiotic inactivation	100	58.45
309	ASM420881v1	Limosilactobacillus fermentum (firmicutes)	MTCC 5898	PRJNA520814	SAMN10868412	October_2013	Homo sapiens	Infant fecal sample	India: Karnal	GCF_004208815.1	2019-02-18	Chromosome	2098685	1784950
310	ASM1227303v1	Limosilactobacillus fermentum (firmicutes)	HFD1	PRJNA615901	SAMN14470504	Feb_2015	Homo sapiens	feces of healthy woman	Russia: Kazan	GCF_012273035.1	2020-04-12	Complete Genome	2101878	2101878
311	ASM1483019v1	Limosilactobacillus fermentum (firmicutes)	HPLD	PRJNA479556	SAMN09580242	2015	Homo sapiens	feces	India: Himachal Pradesh	GCF_014830195.1	2020-09-30	Contig	2018877	2018877
312	ASM334358v1	Limosilactobacillus fermentum (firmicutes)	CIM:MAG 1415	PRJNA397219	SAMN08294985	missing	Homo sapiens	feces	USA:Minnesota, Rochester	n/a	2018-05-23	Scaffold	1758796	1757231
313	ASM286982v1	Limosilactobacillus fermentum (firmicutes)	LfU21	PRJNA417365	SAMN08290293	2012	Homo sapiens	feces of an astronaut	Russia	GCF_002869825.1	2018-01-09	Contig	1966592	1966592
314	ASM279437v1	Limosilactobacillus fermentum (firmicutes)	103	PRJNA417365	SAMN07985466	2012	Homo sapiens	cecum of a 56-year-old man	Russia	GCF_002794375.1	2017-11-20	Contig	2048240	2048240
315	ASM279431v1	Limosilactobacillus fermentum (firmicutes)	311	PRJNA417365	SAMN08014154	2013	Homo sapiens	feces of a 19-year-old female	Russia	GCF_002794315.1	2017-11-20	Contig	2043115	2043115
316	ASM279427v1	Limosilactobacillus fermentum (firmicutes)	279	PRJNA417365	SAMN08014151	2013	Homo sapiens	feces of a 19-year-old female	Russia	GCF_002794275.1	2017-11-20	Contig	1983266	1983266
317	ASM325587v1	Limosilactobacillus fermentum (firmicutes)	CBA7106	PRJNA390215	SAMN07224244	2016_10_13	Homo sapiens	adult feces	South Korea: Bundang	GCF_003255875.1	2018-06-18	Complete Genome	2042277	2042277
318	ASM434968v1	Lactobacillus reuteri (firmicutes)	C88	PRJNA512876	SAMN10689994	2018_12	Homo sapiens	gut inflammatory bowel disease patients.	USA	GCF_004349685.1	2019-03-14	Scaffold	2066995	2066703	Strict	Trimethoprim-resistant dihydrofolate reductase DfrA42		protein homolog model	trimethoprim resistant dihydrofolate reductase dfr	diaminopyrimidine antibiotic	antibiotic target replacement	26.77	91.53
319	ASM434965v1	Lactobacillus reuteri (firmicutes)	C93	PRJNA512876	SAMN10689995	2018_13	Homo sapiens	gut inflammatory bowel disease patients.	USA	GCF_004349655.1	2019-03-14	Scaffold	1887942	1887846	Strict	Trimethoprim-resistant dihydrofolate reductase DfrA42		protein homolog model	trimethoprim resistant dihydrofolate reductase dfr	diaminopyrimidine antibiotic	antibiotic target replacement	26.77	91.53
320	PRJEB20106	Lactobacillus timonensis (firmicutes)	Marseille-P3825	PRJEB20106	SAMEA104414376	missing	missing	stool	missing	GCF_900240275.1	2018-01-02	Scaffold	1678325	1676639	Strict	poxtA		protein homolog model	ABC-F ATP-binding cassette ribosomal protection protein	macrolide antibiotic, lincosamide antibiotic, streptogramin antibiotic, tetracycline antibiotic, oxazolidinone antibiotic, phenicol antibiotic, pleuromutilin antibiotic	antibiotic target protection	100	83.21
															Strict	Trimethoprim-resistant dihydrofolate reductase DfrA42		protein homolog model	trimethoprim resistant dihydrofolate reductase dfr	diaminopyrimidine antibiotic	antibiotic target replacement	25.2	93.22
321	ASM1516075v1	Limosilactobacillus fermentum (firmicutes)	UBLF-31	PRJNA493554	SAMN15930389	10_Oct_2001	Homo sapiens	feces from healthy subject	India: Unique Biotech Limited, Hyderabad	n/a	2020-10-31	Contig	1992681	1992681
